# Supplementary material for: Four Prenylflavone Derivatives with Antiplasmodial Activities from the Stem of Tephrosia purpurea subsp. leptostachya
Source: PubMed Central journal article supplement (PMC6151588; doi:10.3390/molecules22091514), 2017-09-10
Supplement: molecules-22-01514-s001.pdf [file molecules-22-01514-s001.pdf]

# Four prenylflavone derivatives with antiplasmodial activities from the stems of *Tephrosia purpurea* subsp. *leptostachya*

Yoseph Atilaw, Lois Muiva-Mutisya, Albert Ndakala, Hoseah M. Akala, Redemptah Yeda, Yu J. Wu, Paolo Coghi, Vincent K.W. Wong, Máté Erdélyi, Abiy Yenesew

## Table of Contents

| Figure                                                                                                               | Content Page |
|----------------------------------------------------------------------------------------------------------------------|--------------|
| Figs. S1 –S6 <sup>1</sup> H & <sup>13</sup> C NMR; COSY; NOESY; HSQC & HMBC correlations of compound <b>1</b>        | 3-8          |
| Fig. S7 HRMS of compound <b>1</b>                                                                                    | 9            |
| Fig. S8 UV spectrum of compound <b>1</b>                                                                             | 10           |
| Figs. S9 –S13 <sup>1</sup> H & <sup>13</sup> C NMR; NOESY; HSQC & HMBC correlations of compound <b>2</b>             | 11-15        |
| Fig. S14 HRMS of compound <b>2</b>                                                                                   | 16           |
| Fig. S15 UV spectrum of compound <b>2</b>                                                                            | 17           |
| Fig. S16-S21 <sup>1</sup> H; <sup>13</sup> C; COSY; NOESY; HSQC & HMBC correlations of compound <b>3</b>             | 18-23        |
| Fig. S22 HRMS of compound <b>3</b>                                                                                   | 24           |
| Fig. S23 UV spectrum of compound <b>3</b>                                                                            | 25           |
| Fig. S24-S29 <sup>1</sup> H and <sup>13</sup> C; COSY; NOESY; HSQC & HMBC correlations of compound <b>4</b>          | 26-31        |
| Fig. S30 HRMS of compound <b>4</b>                                                                                   | 32           |
| Fig. S31 UV spectrum of compound <b>4</b>                                                                            | 33           |
| Table S11H (800 MHz) and <sup>13</sup> C (200 MHz) NMR spectroscopic data for compound <b>5</b> , CDCl <sub>3</sub>  | 34           |
| Table S21H (800 MHz) and <sup>13</sup> C (200 MHz) NMR spectroscopic data for compound <b>6</b> , CDCl <sub>3</sub>  | 35           |
| Table S31H (800 MHz) and <sup>13</sup> C (200 MHz) NMR spectroscopic data for compound <b>7</b> , CDCl <sub>3</sub>  | 36           |
| Table S41H (800 MHz) and <sup>13</sup> C (200 MHz) NMR spectroscopic data for compound <b>8</b> , CDCl <sub>3</sub>  | 37           |
| Table S51H (800 MHz) and <sup>13</sup> C (200 MHz) NMR spectroscopic data for compound <b>9</b> , CDCl <sub>3</sub>  | 38           |
| Table S61H (800 MHz) and <sup>13</sup> C (200 MHz) NMR spectroscopic data for compound <b>10</b> , CDCl <sub>3</sub> | 39           |
| Table S71H (800 MHz) and <sup>13</sup> C (200 MHz) NMR spectroscopic data for compound <b>11</b> , CDCl <sub>3</sub> | 40           |

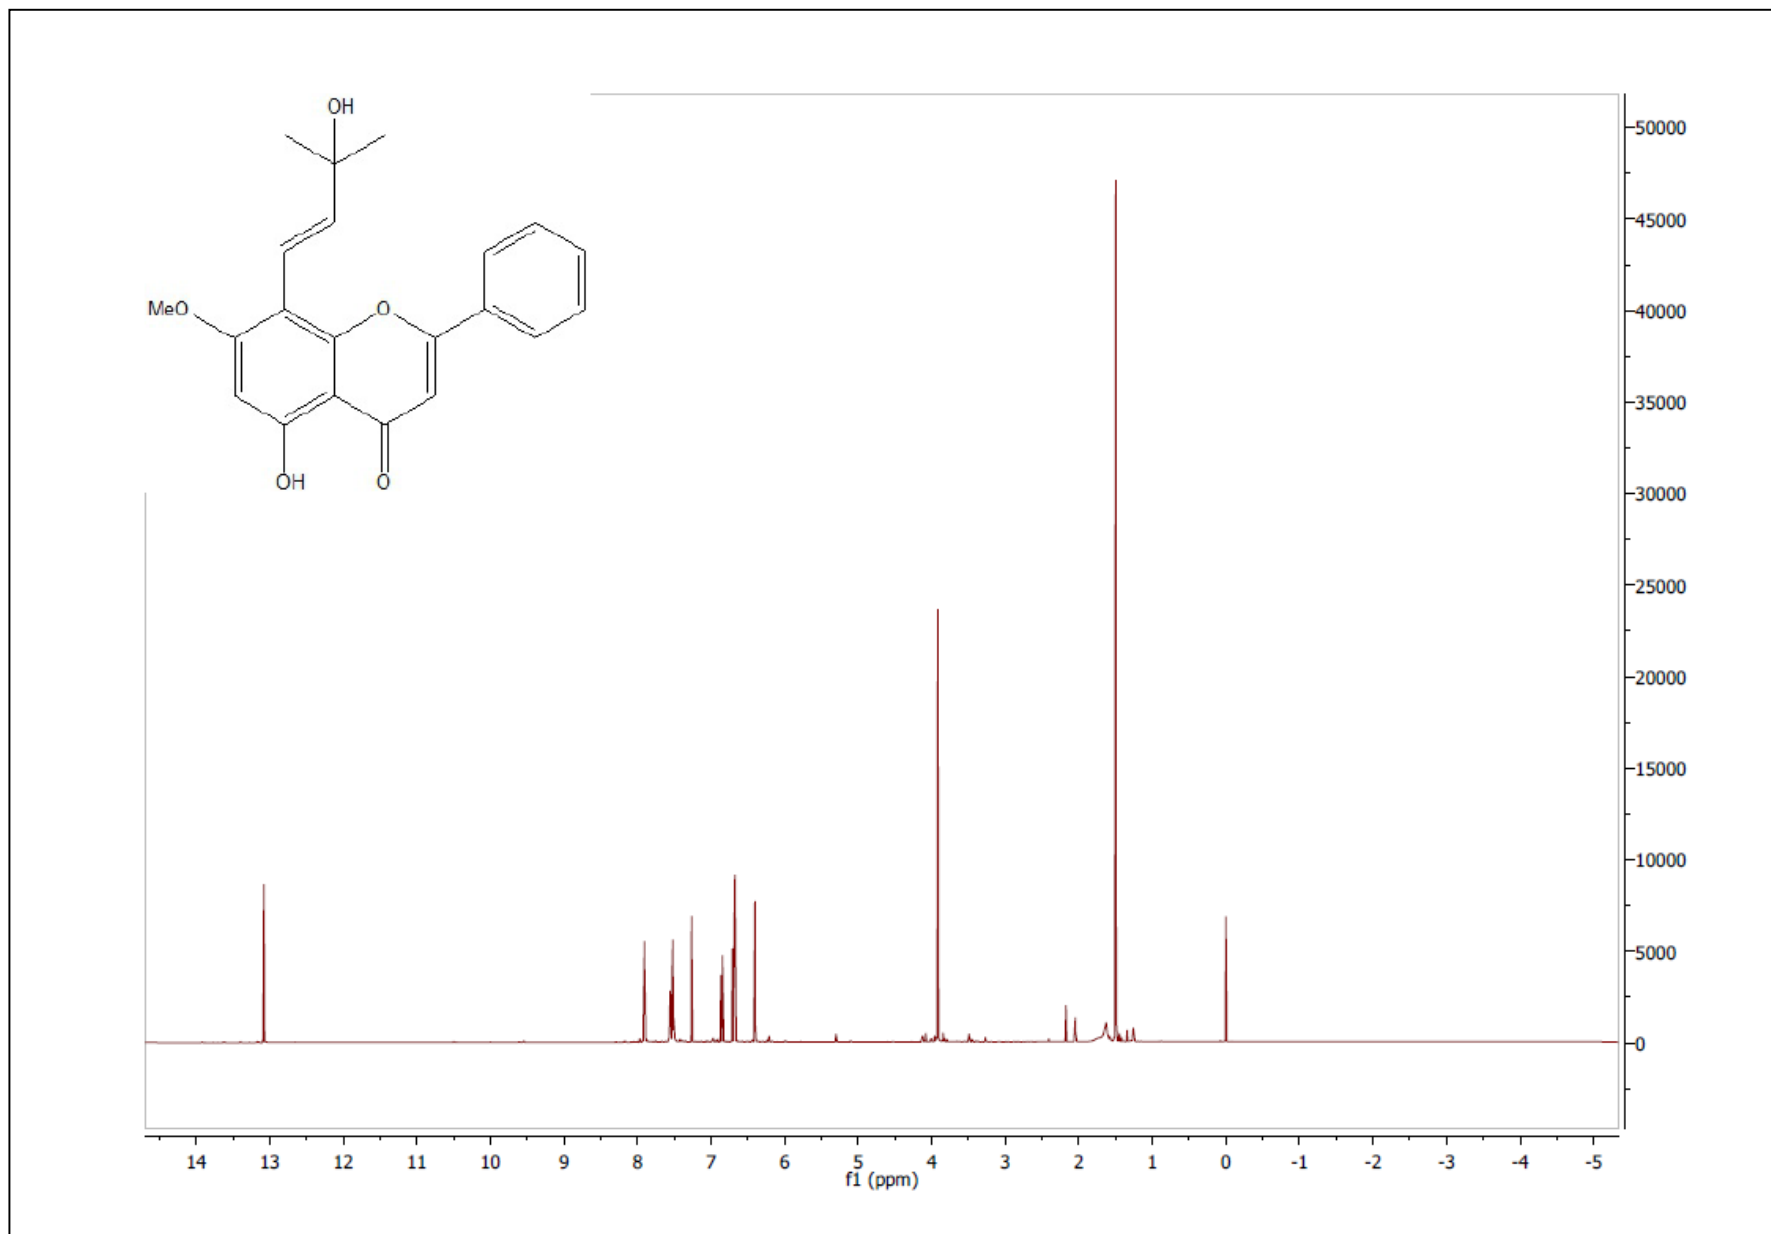

Fig. S1: <sup>1</sup>H NMR spectrum of compound 1 (800 MHz; CDCl<sub>3</sub>)

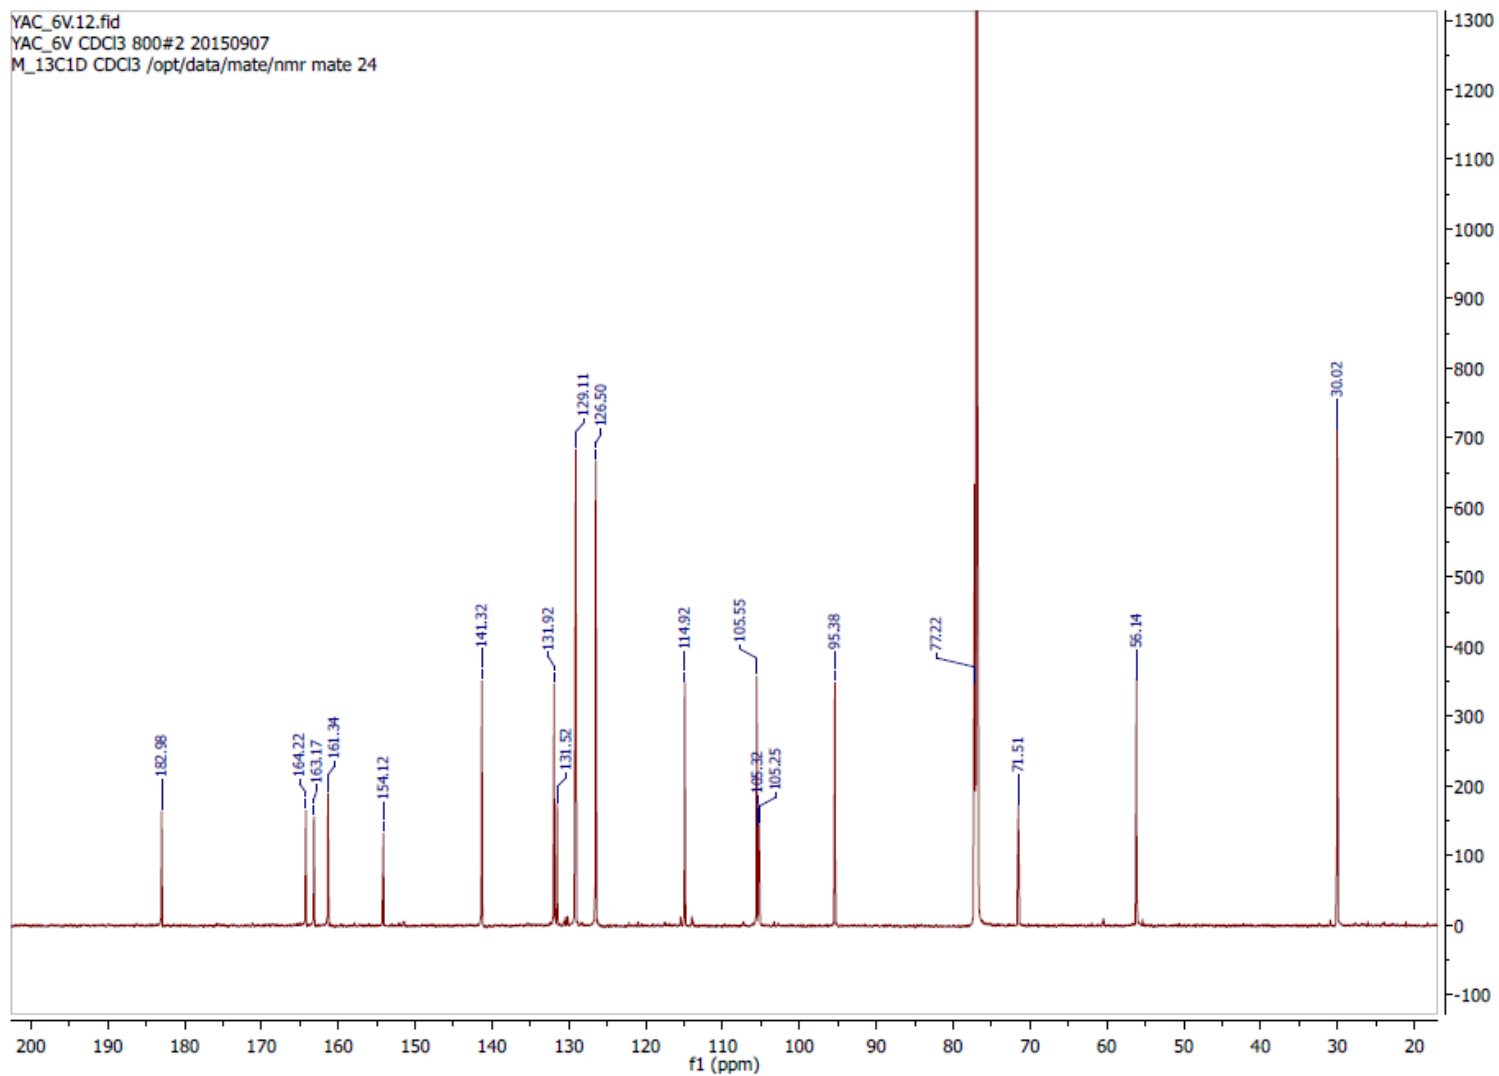

Fig. S2:  $^{13}\text{C}$  NMR spectrum of compound 1 (200 MHz;  $\text{CDCl}_3$ )

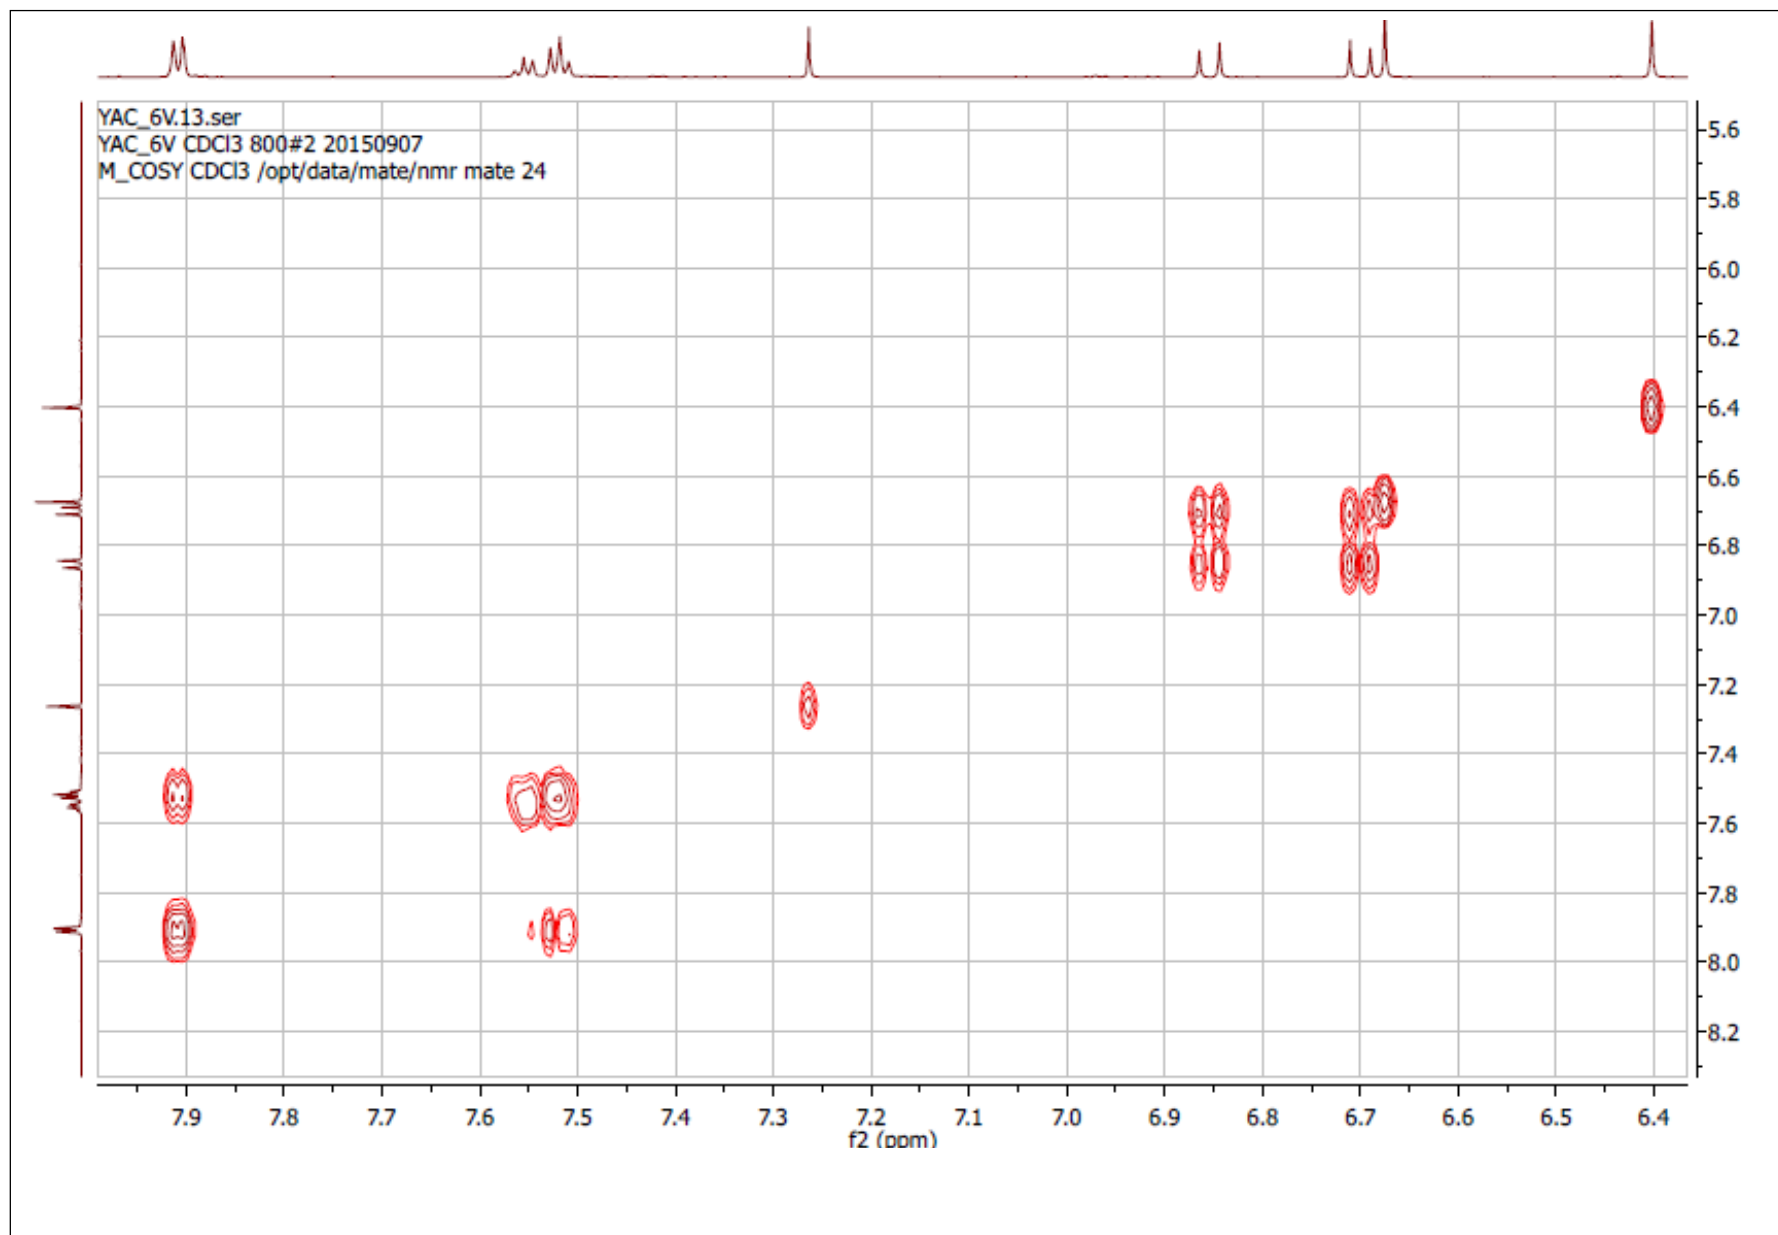

Fig. S3: COSY spectrum of compound **1** (CDCl<sub>3</sub>)

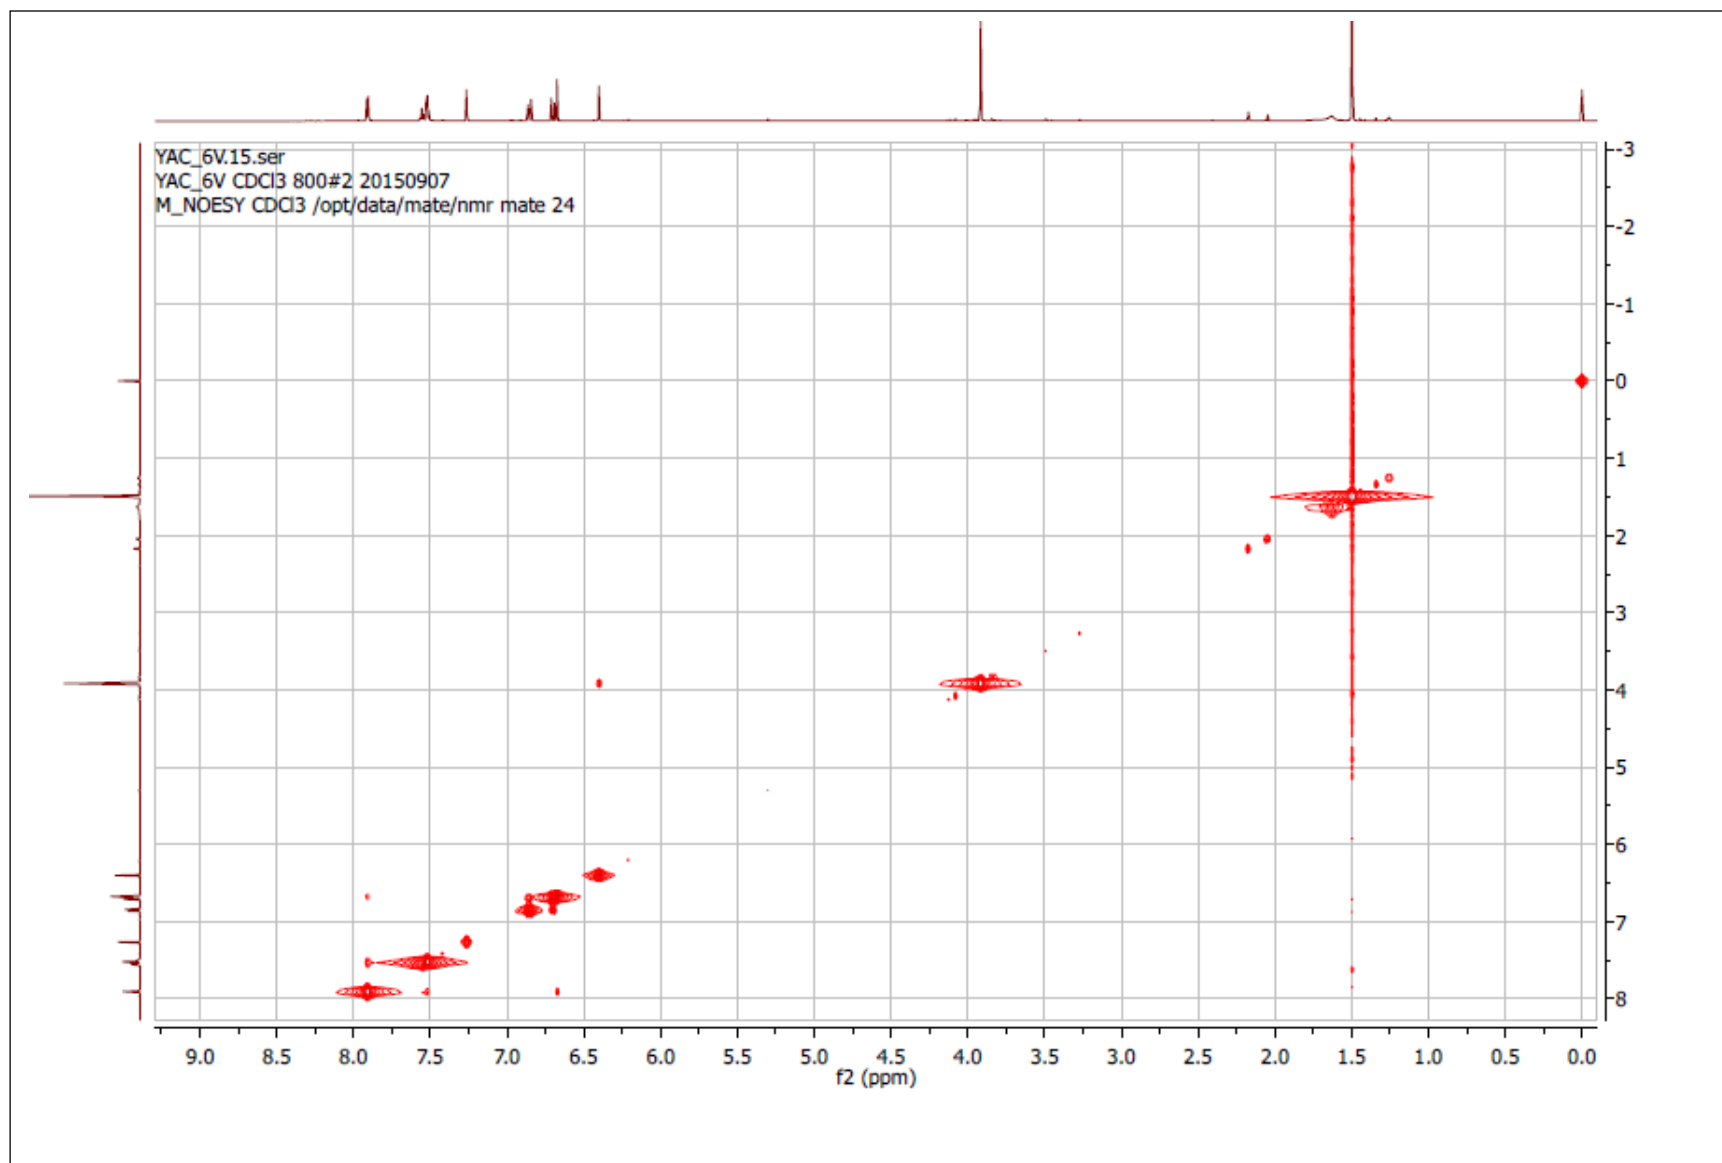

Fig. S4: NOESY spectrum of compound **1** (CDCl<sub>3</sub>)

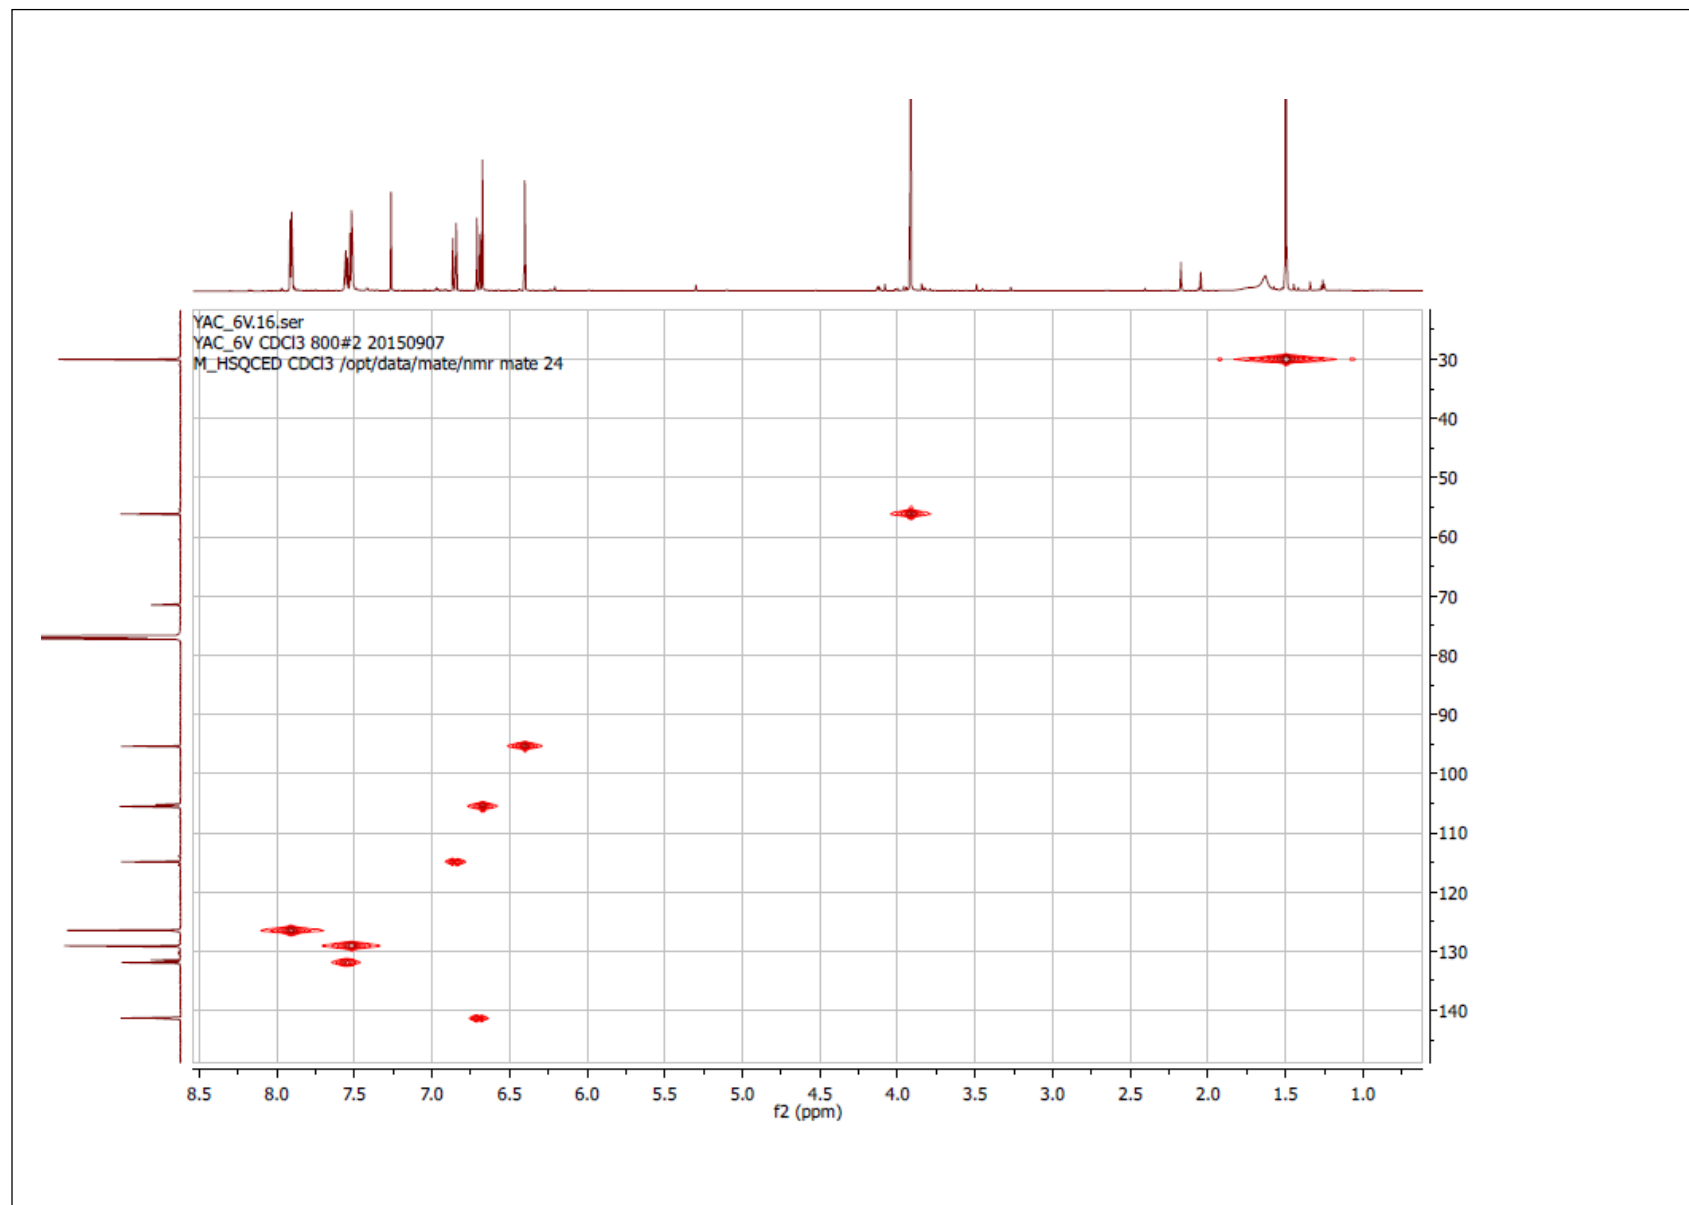

Fig. S5: HSQC spectrum of compound **1** (CDCl<sub>3</sub>)

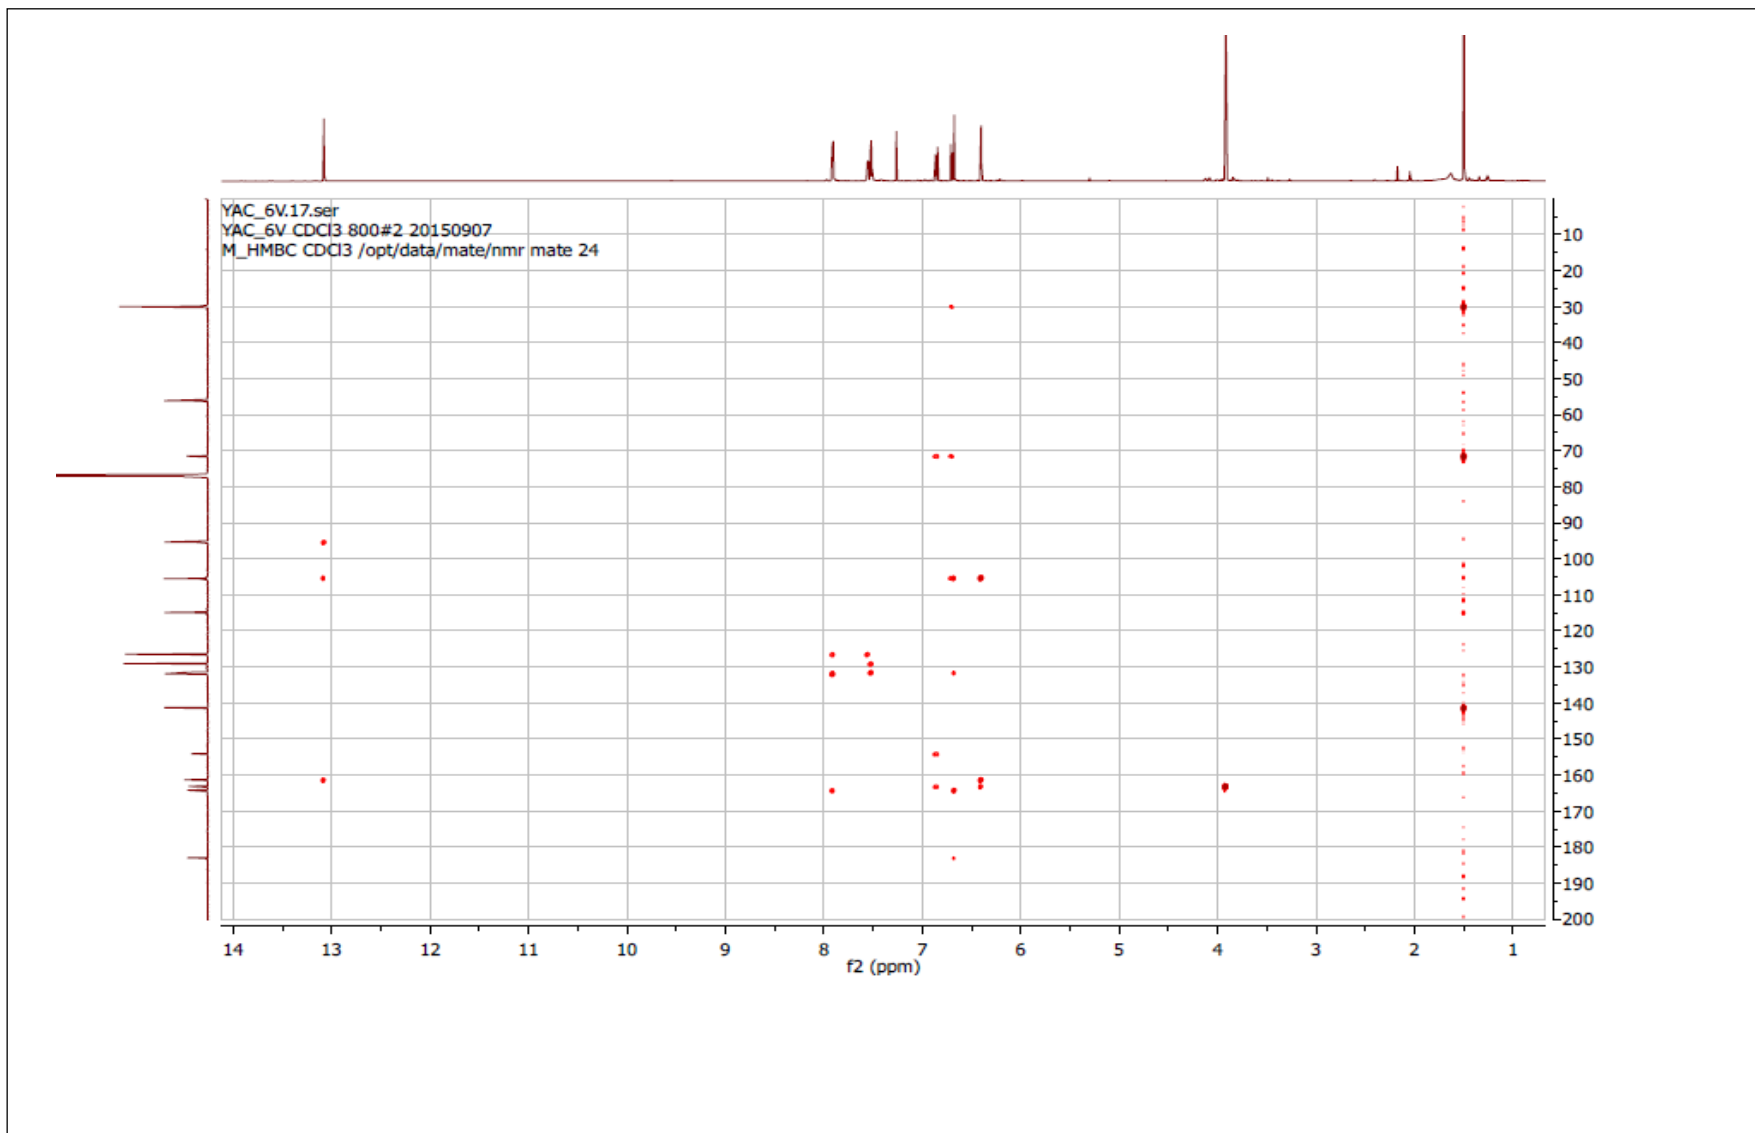

Fig. S6: HMBC spectrum of compound **1** (CDCl<sub>3</sub>)

Yoseph\_08 #164-167 RT: 0.60-0.61 AV: 4 NL: 1.05E4  
T: + c Full ms [ 35.00-500.00]

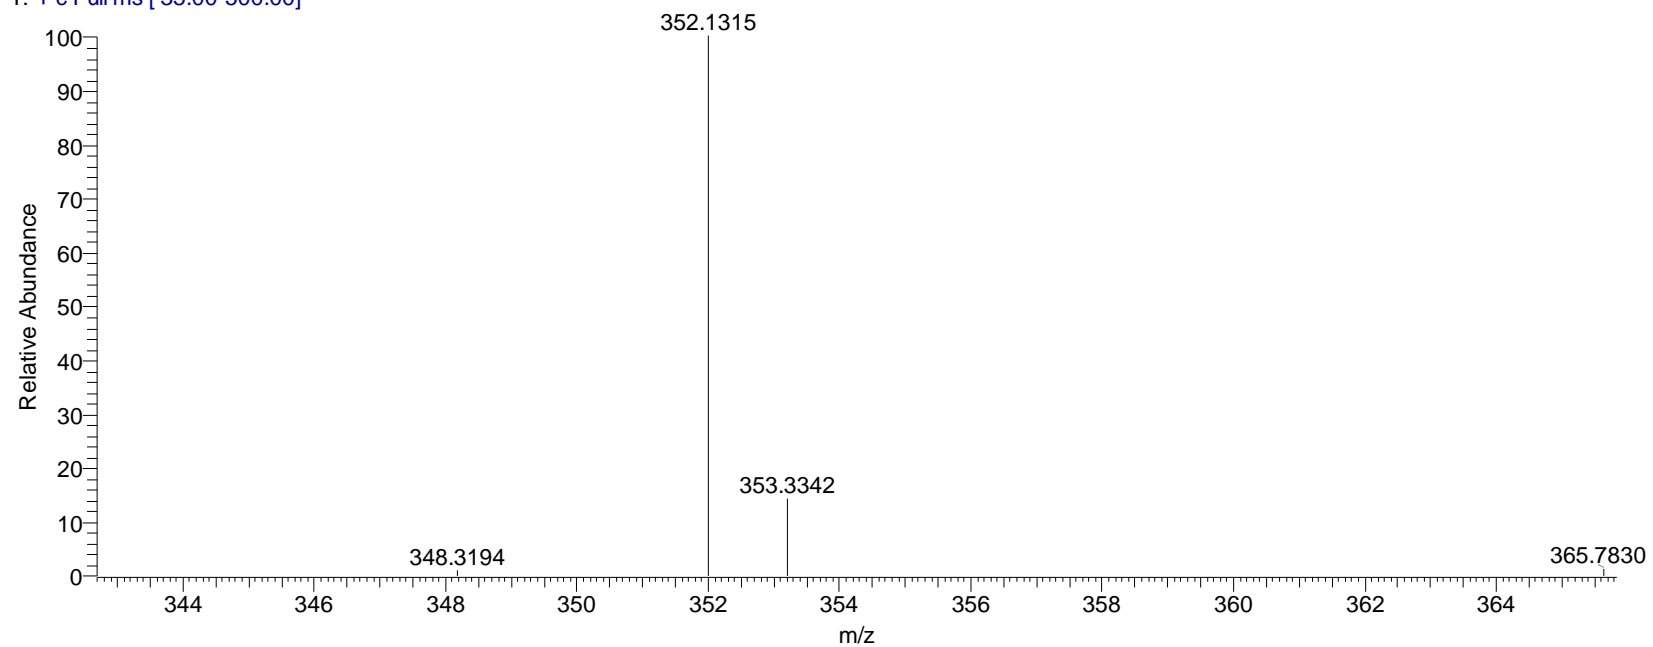

Fig. S7: HRMS of compound 1



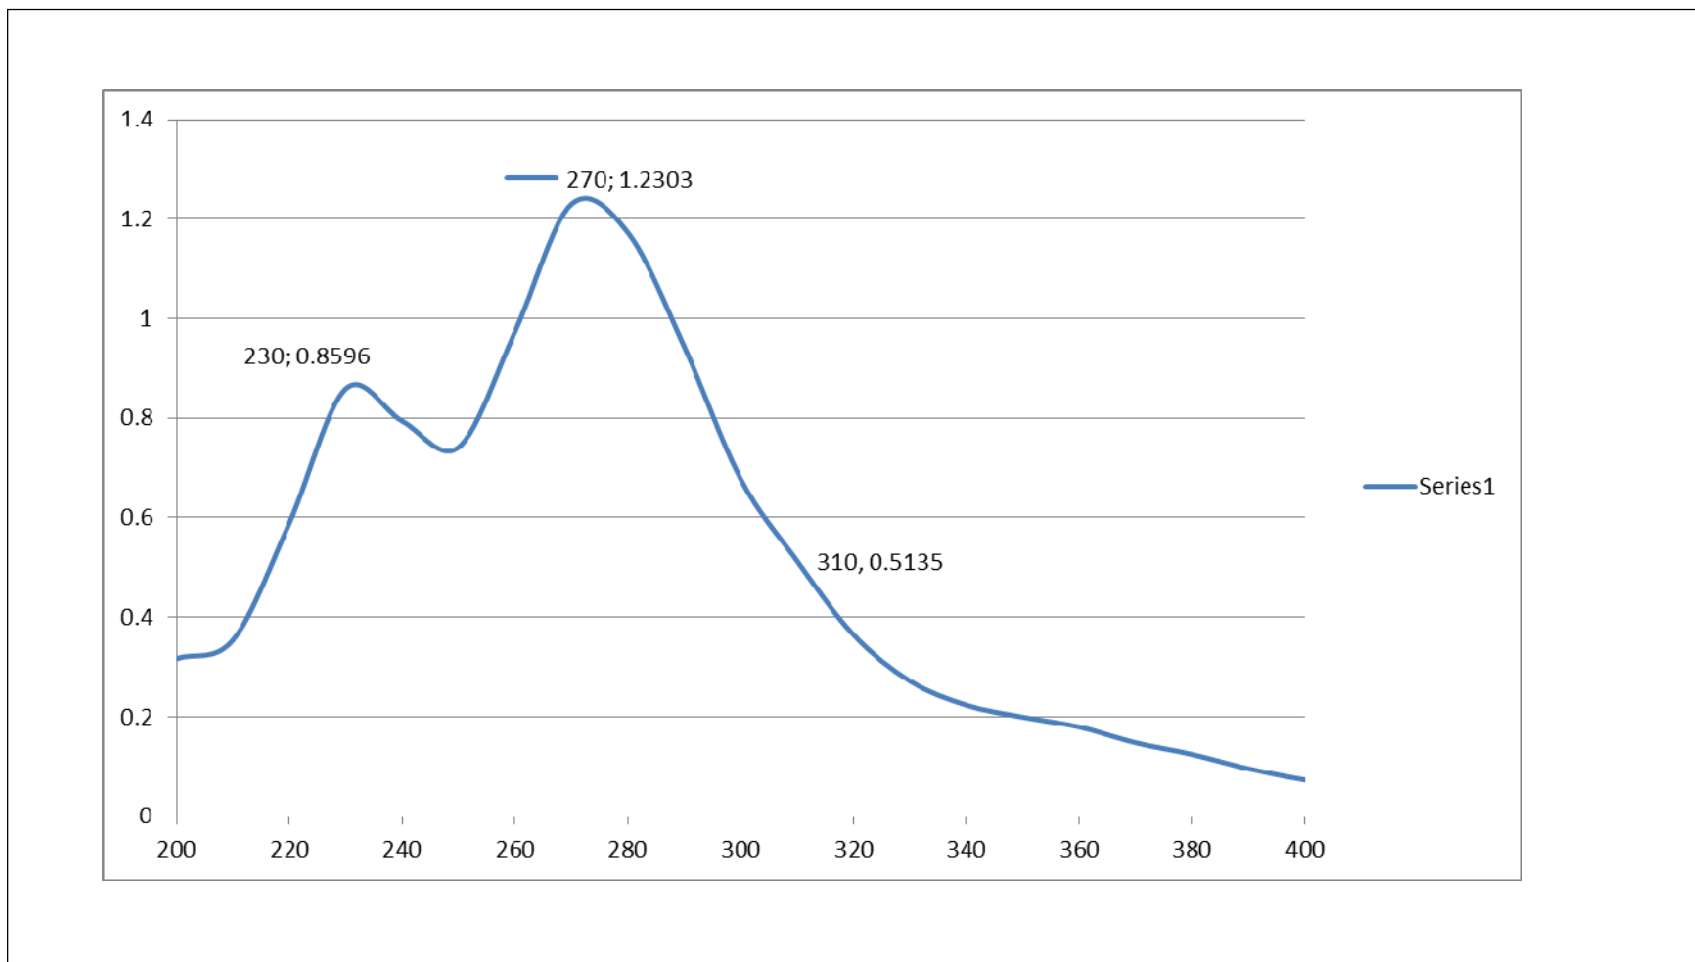

Fig. S8: UV spectrum of compound **1**

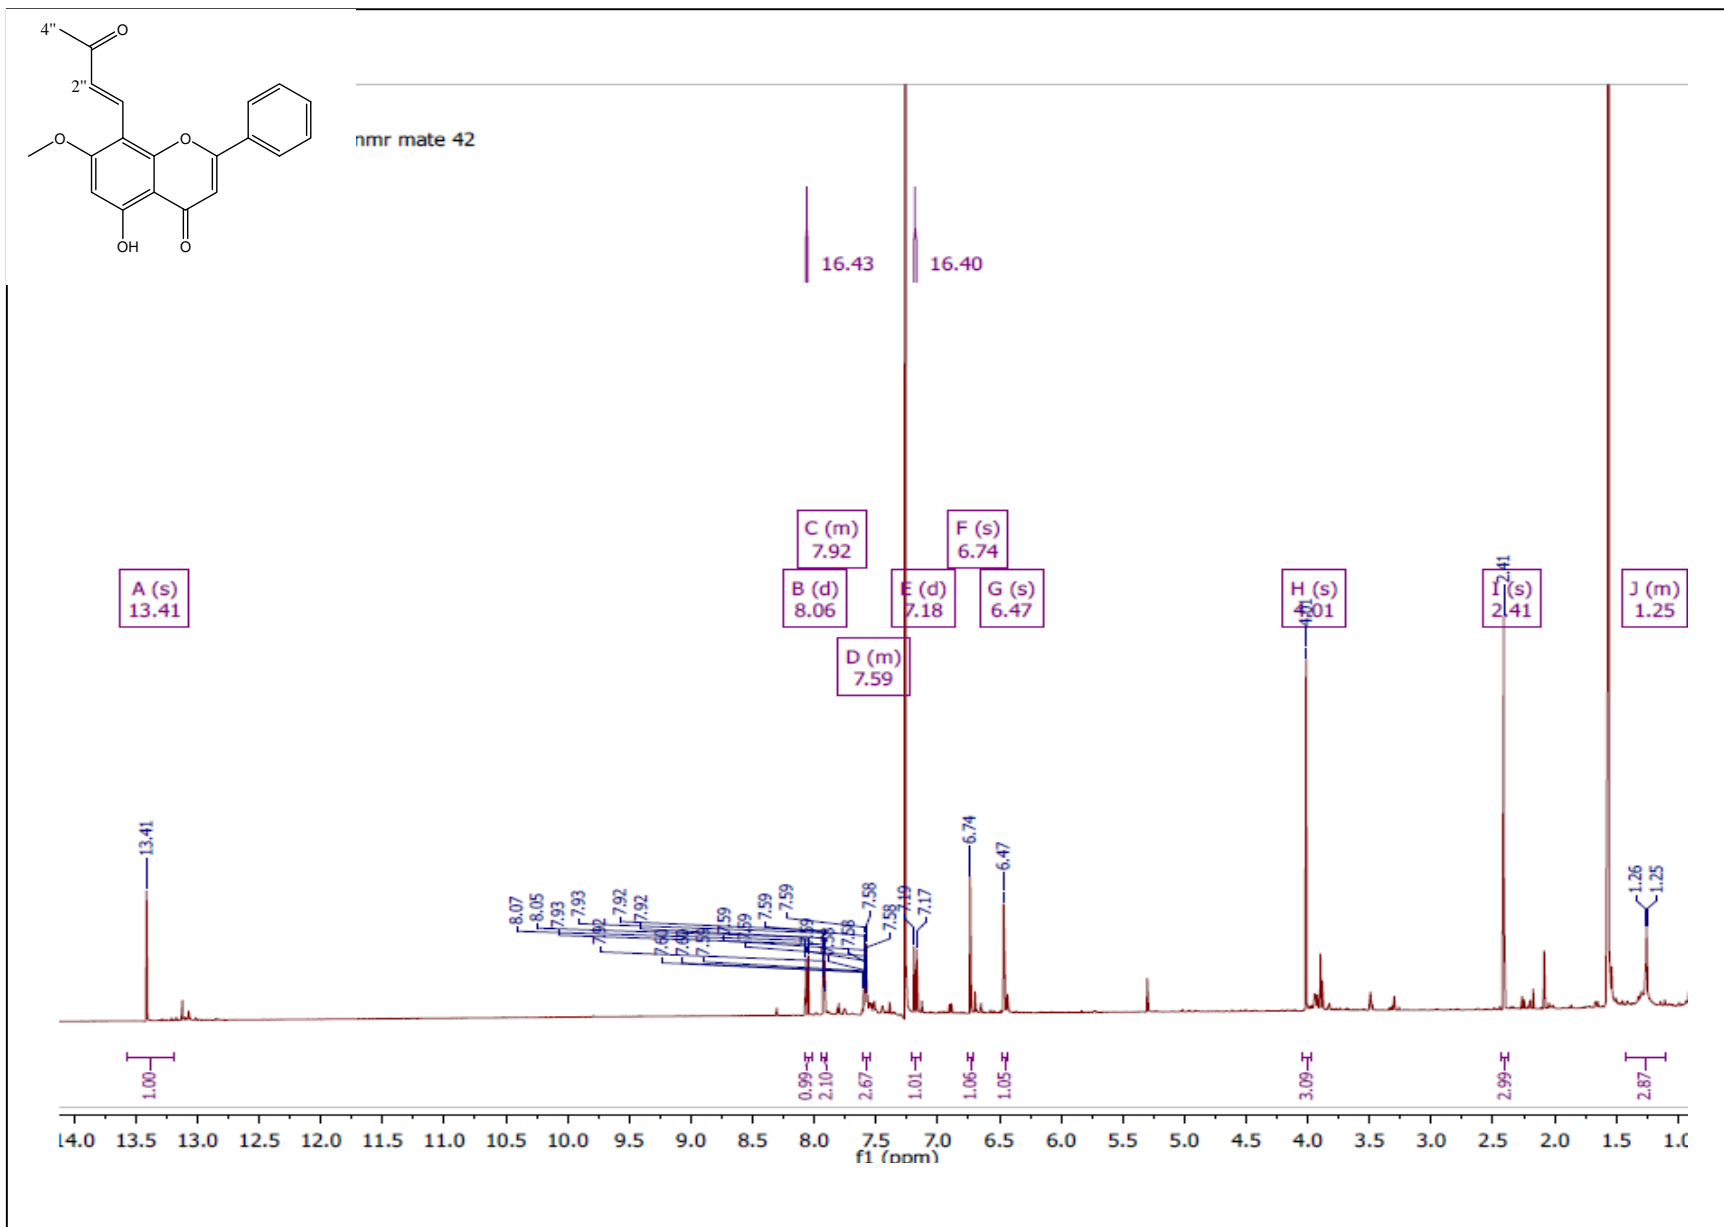

Fig. S9:  $^1\text{H}$  NMR spectrum of compound 2 (800 MHz;  $\text{CDCl}_3$ )

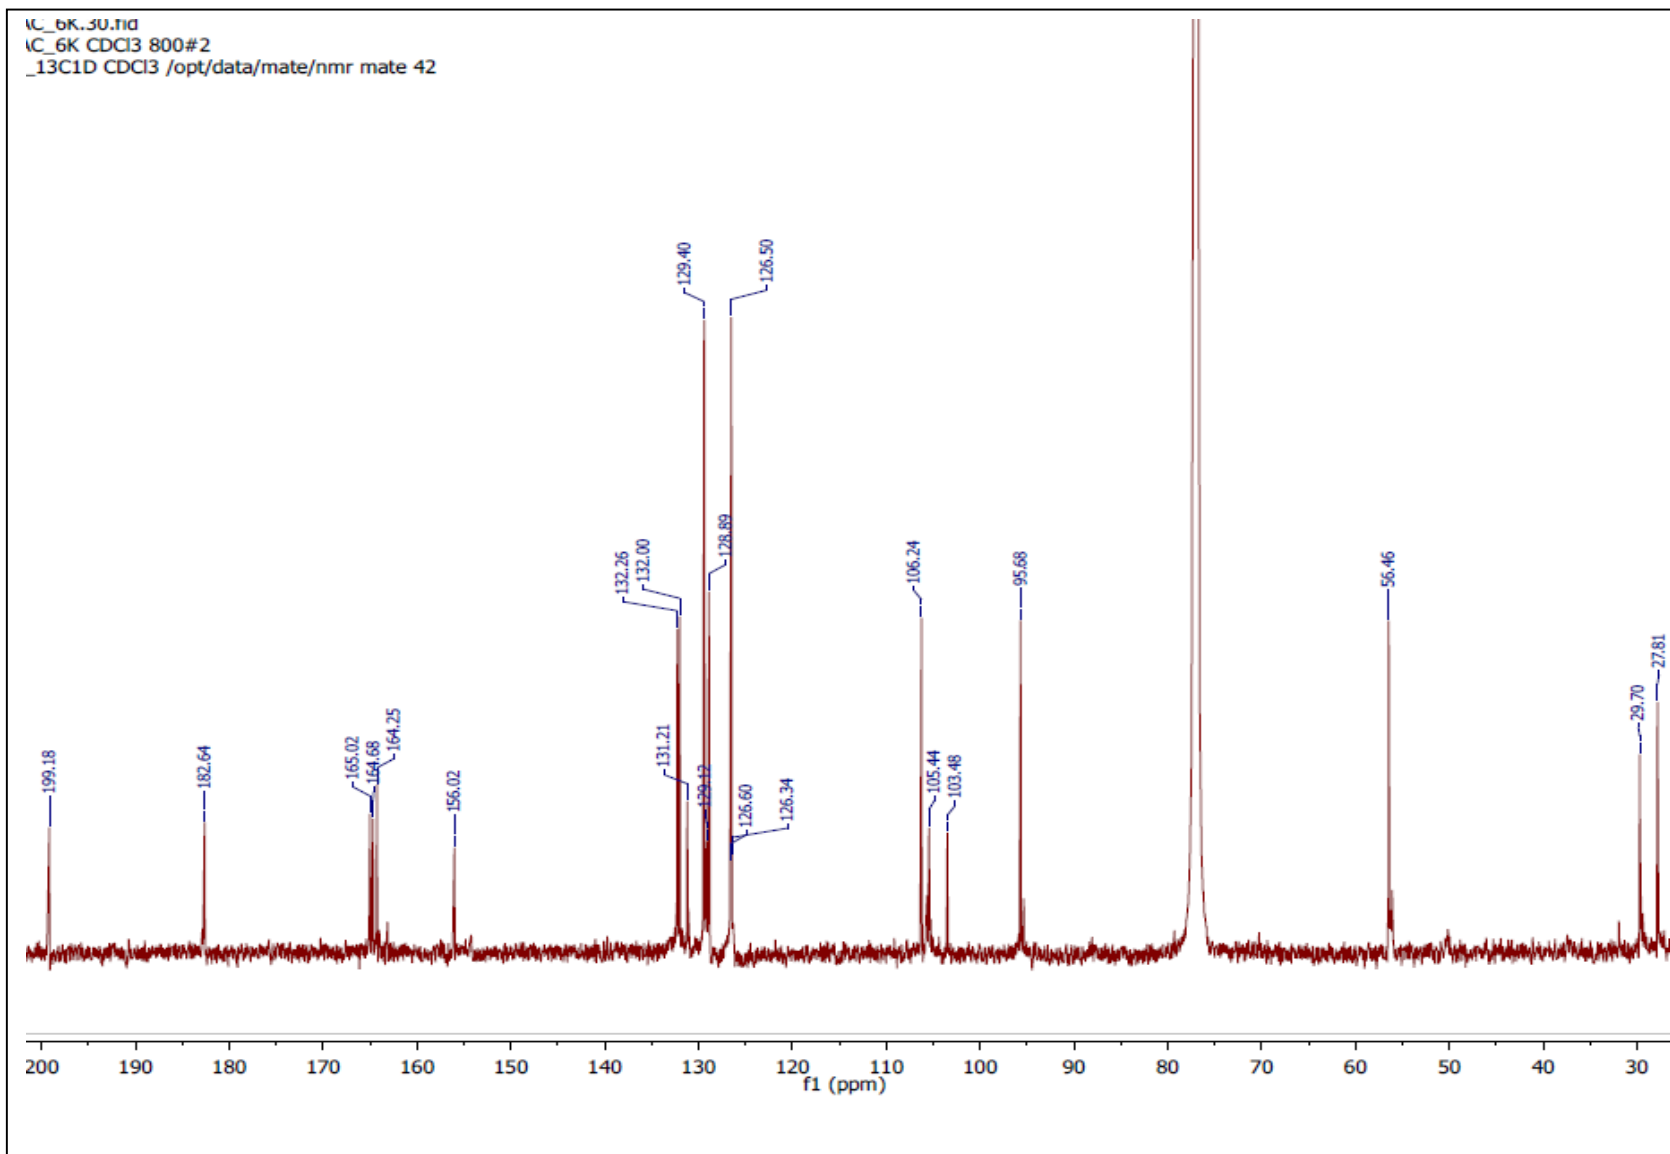

Fig. S10:  $^{13}\text{C}$  NMR spectrum of compound **2** (200 MHz;  $\text{CDCl}_3$ )

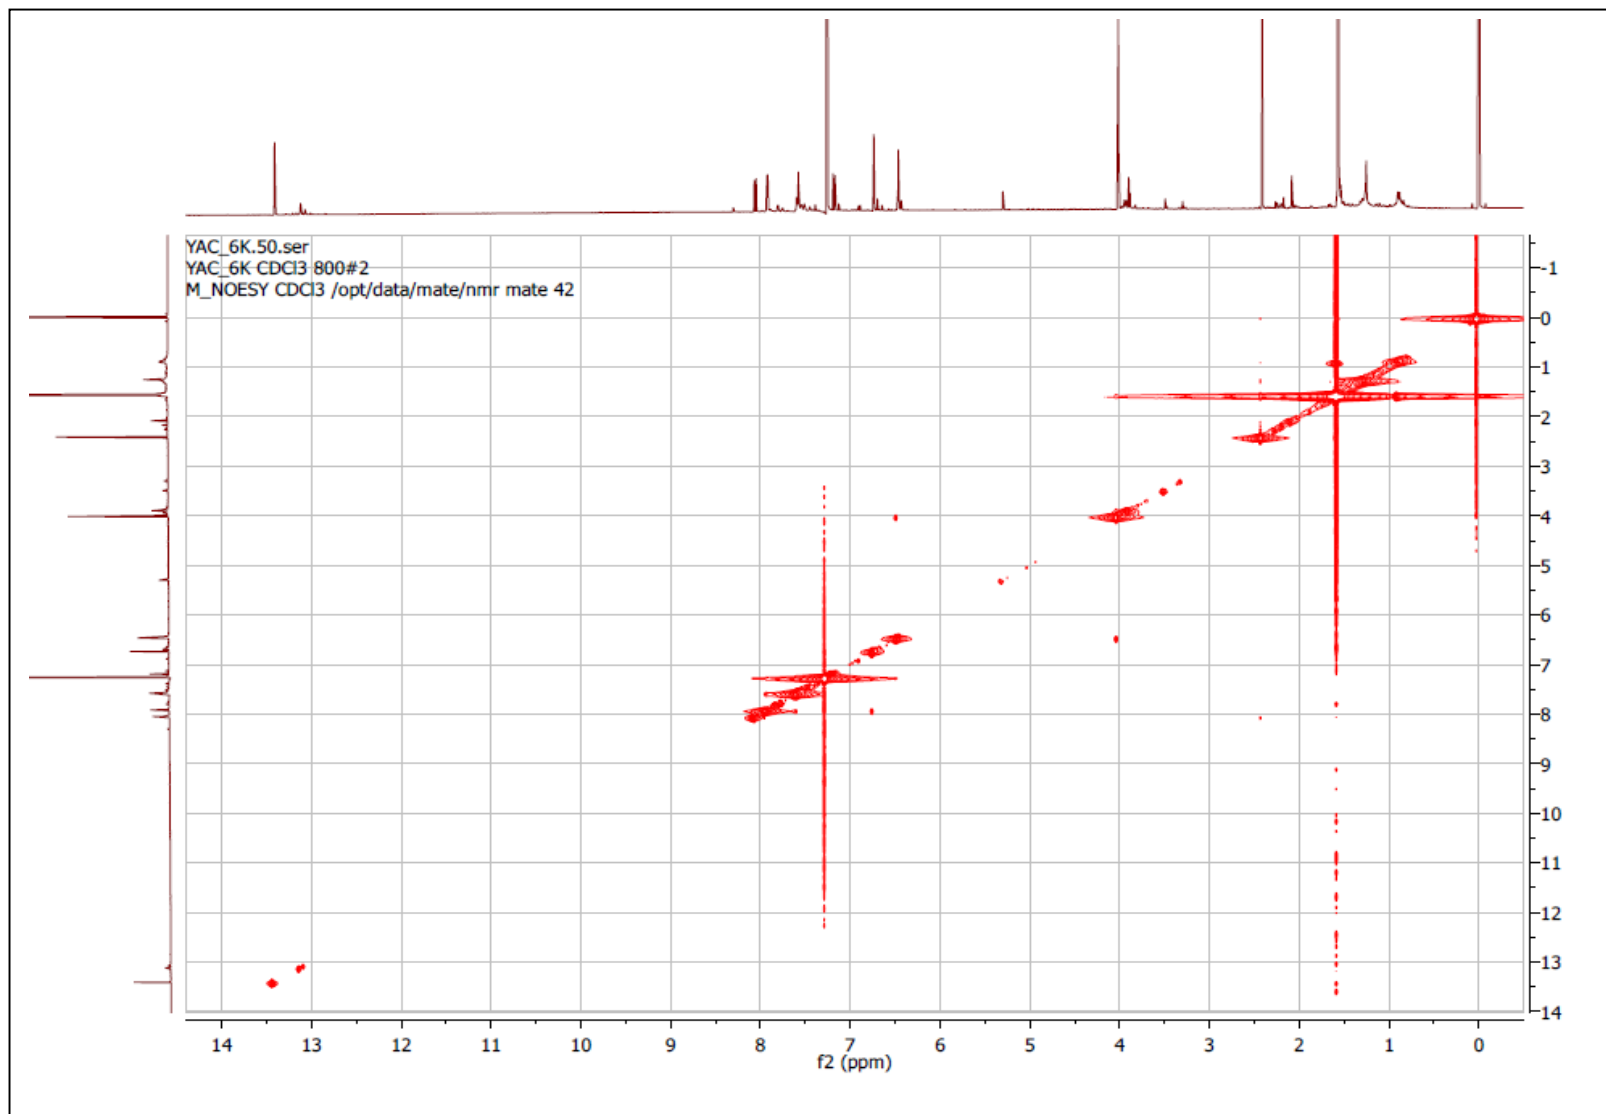

Fig. S11: NOESY spectrum of compound **2** (CDCl<sub>3</sub>)

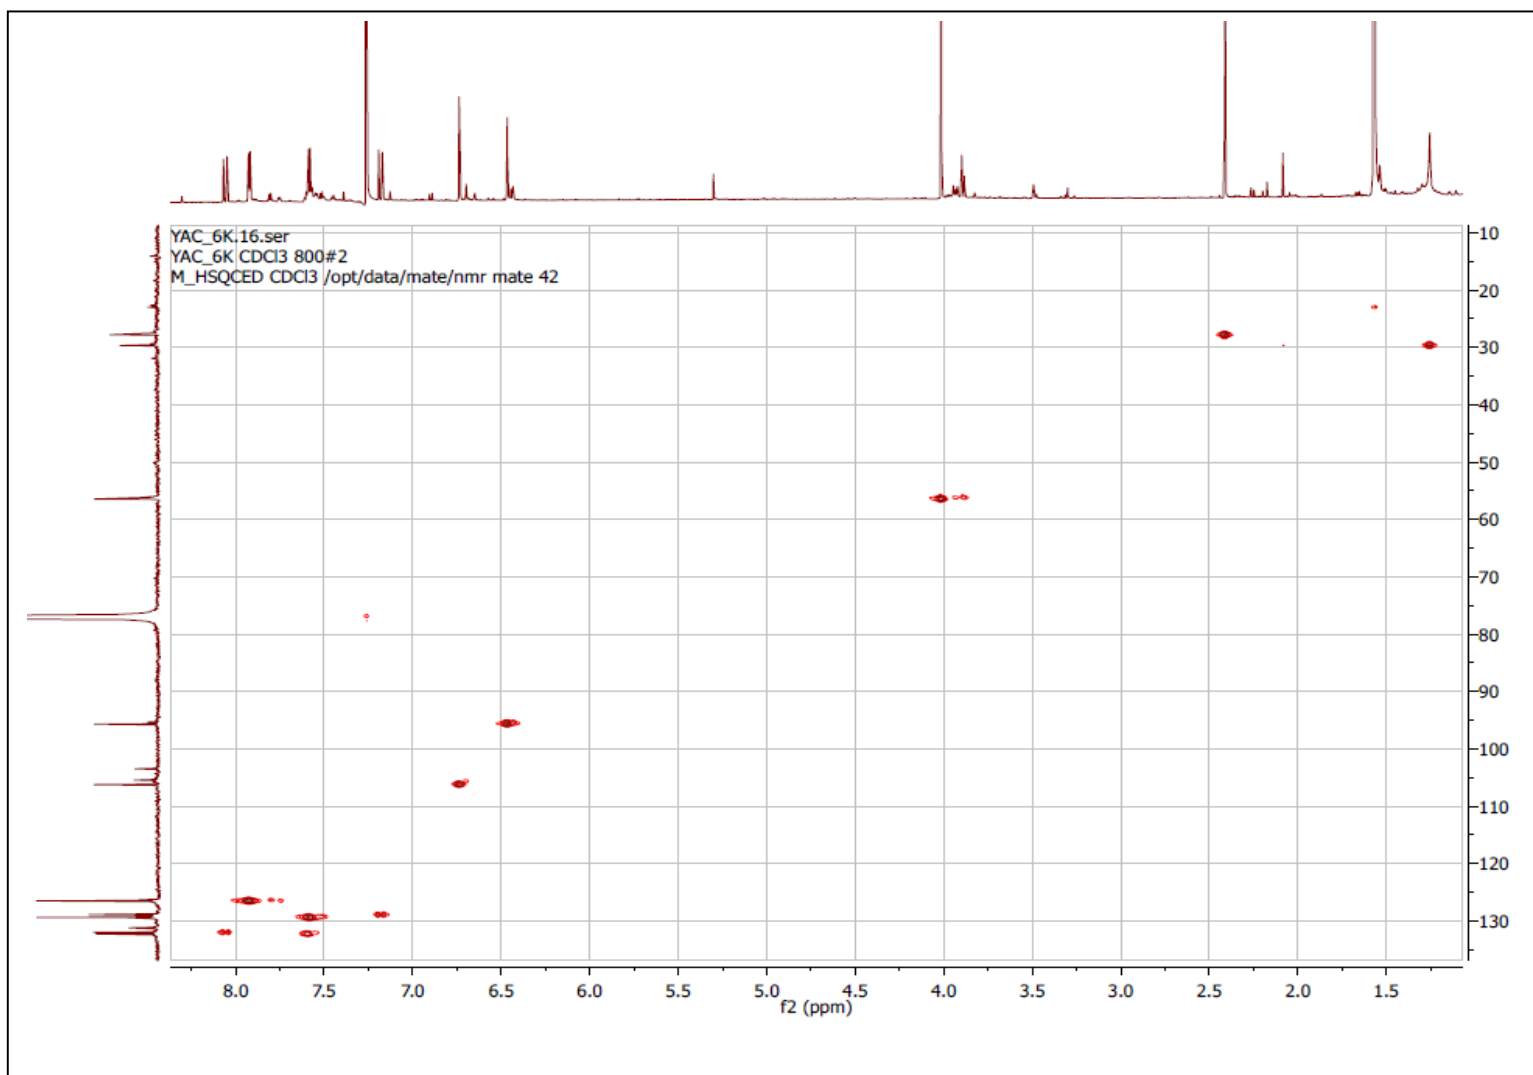

Fig. S12: HSQC spectrum of compound **2** (CDCl<sub>3</sub>)

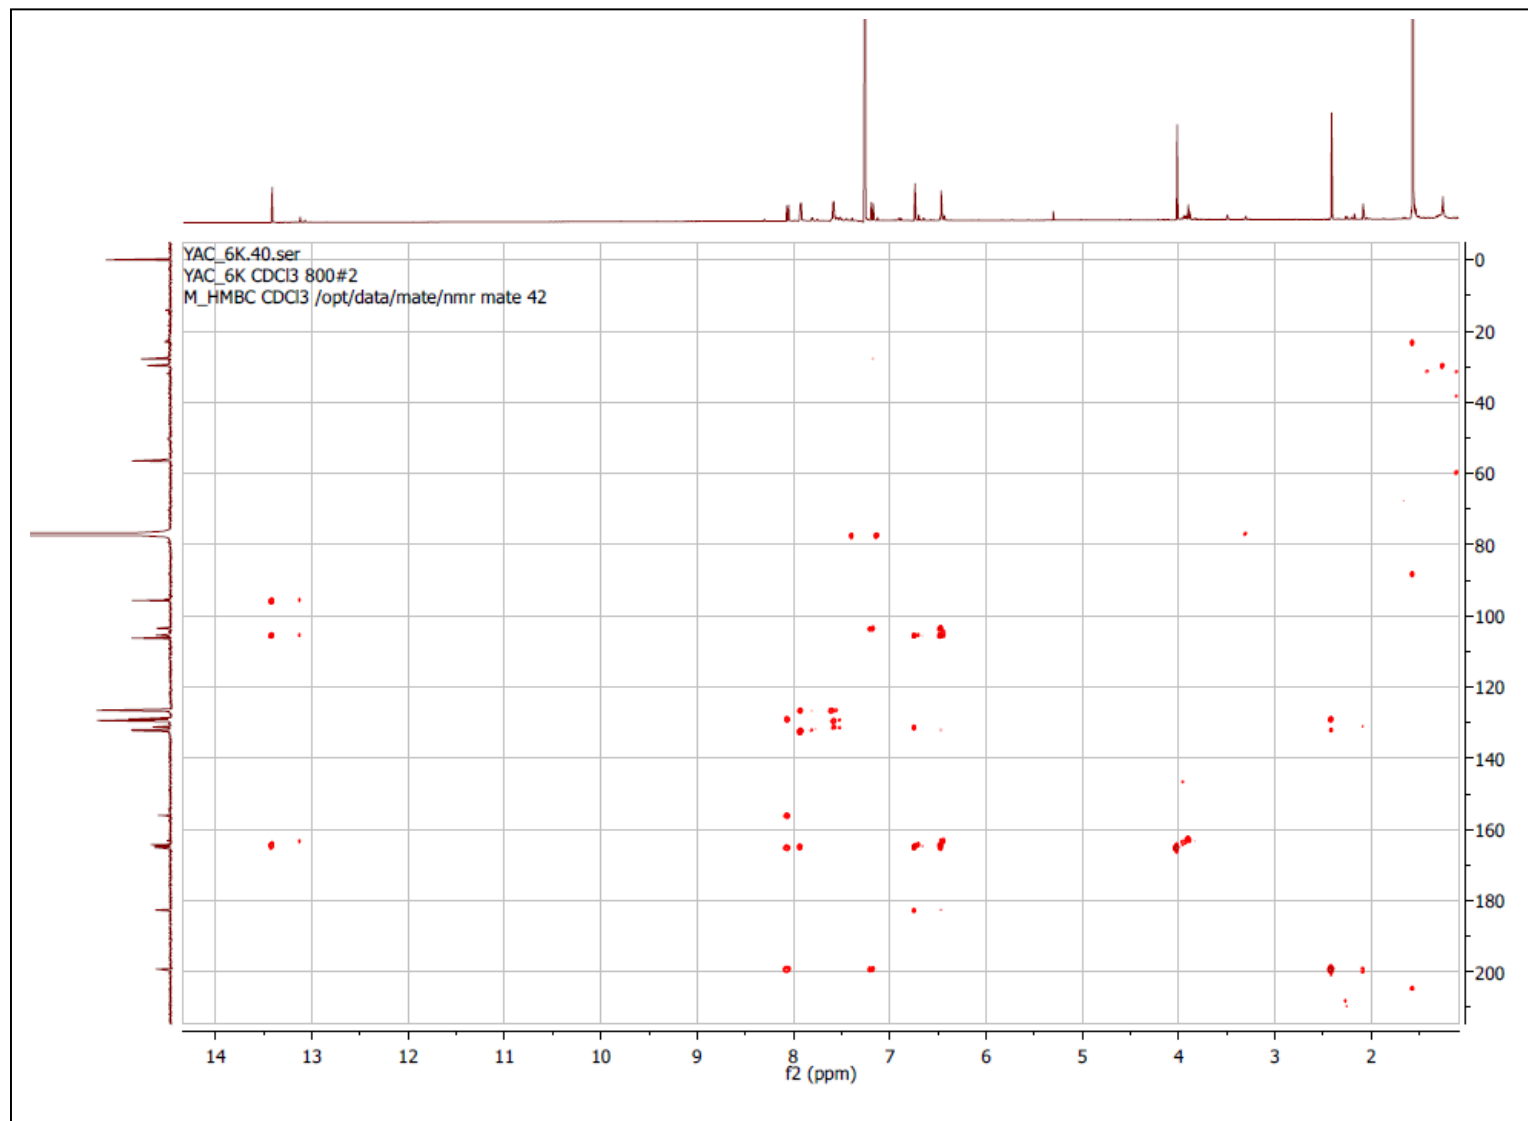

Fig. S13: HMBC spectrum of compound **2** (CDCl<sub>3</sub>)

Yoseph\_07 #160-173 RT: 0.59-0.63 AV: 14 NL: 1.92E2  
T: + c Full ms [ 35.00-500.00]

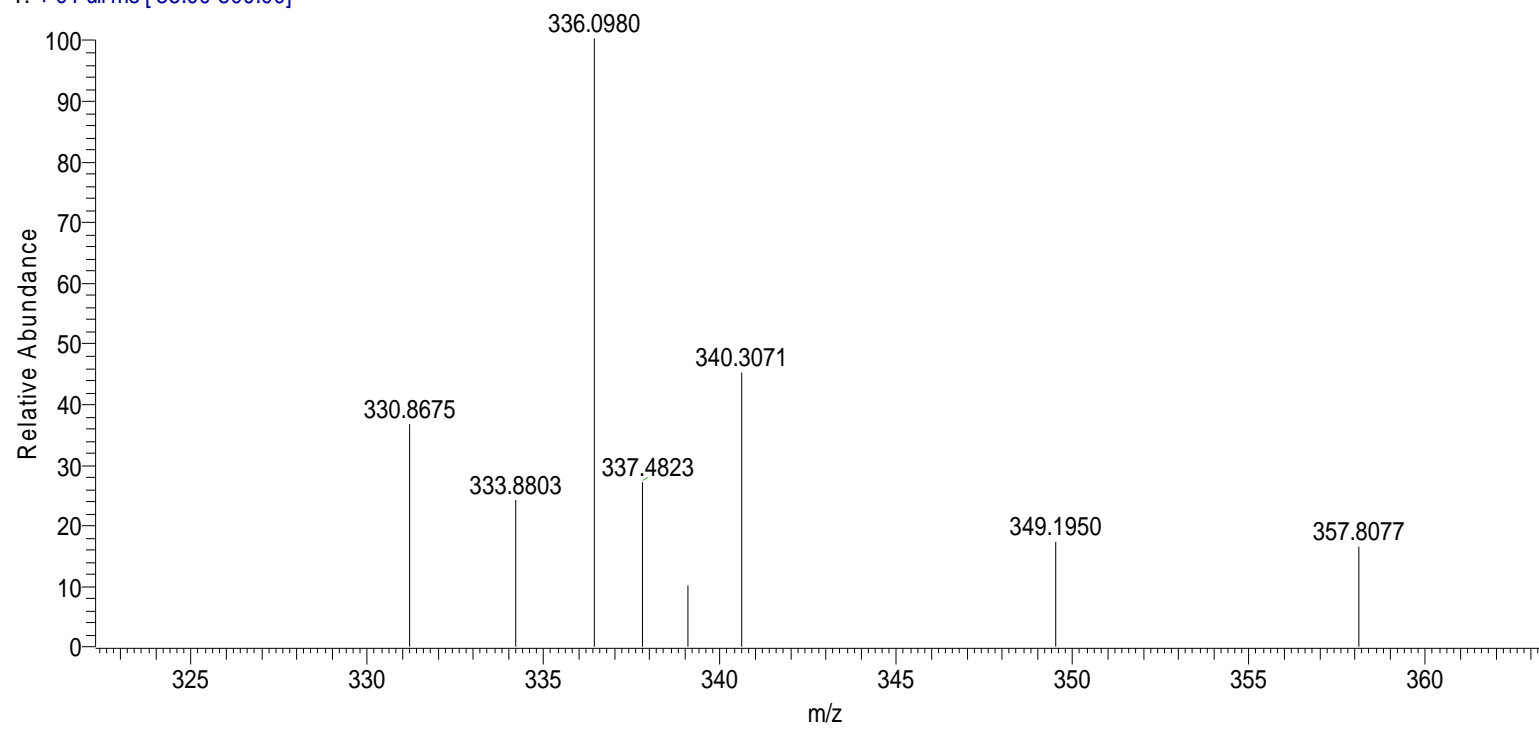

Fig. S14: HRMS of compound 2

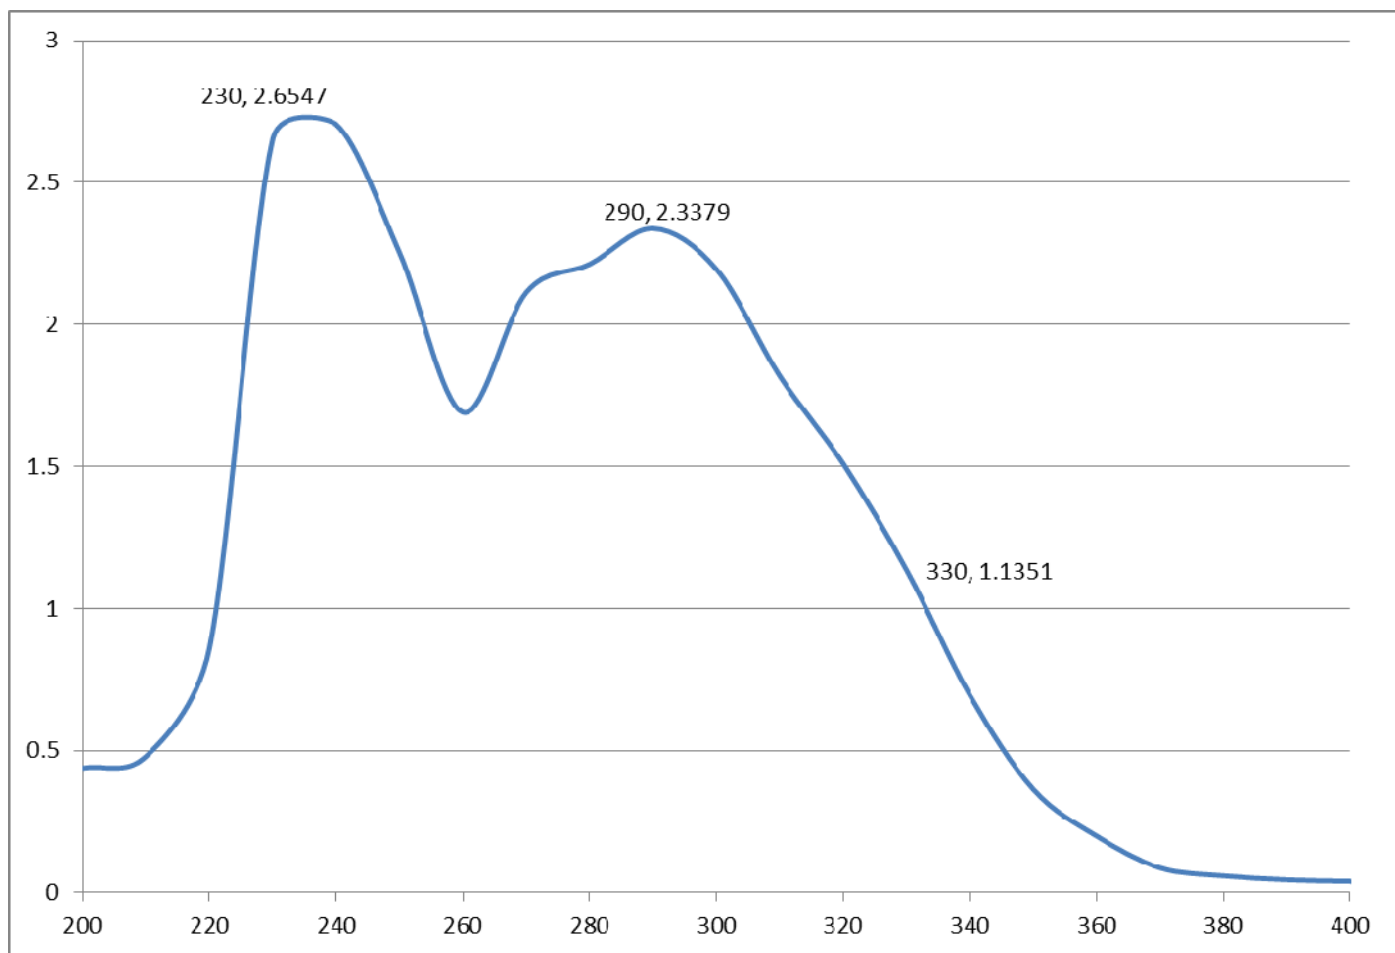

Fig. S15: UV spectrum of compound 2



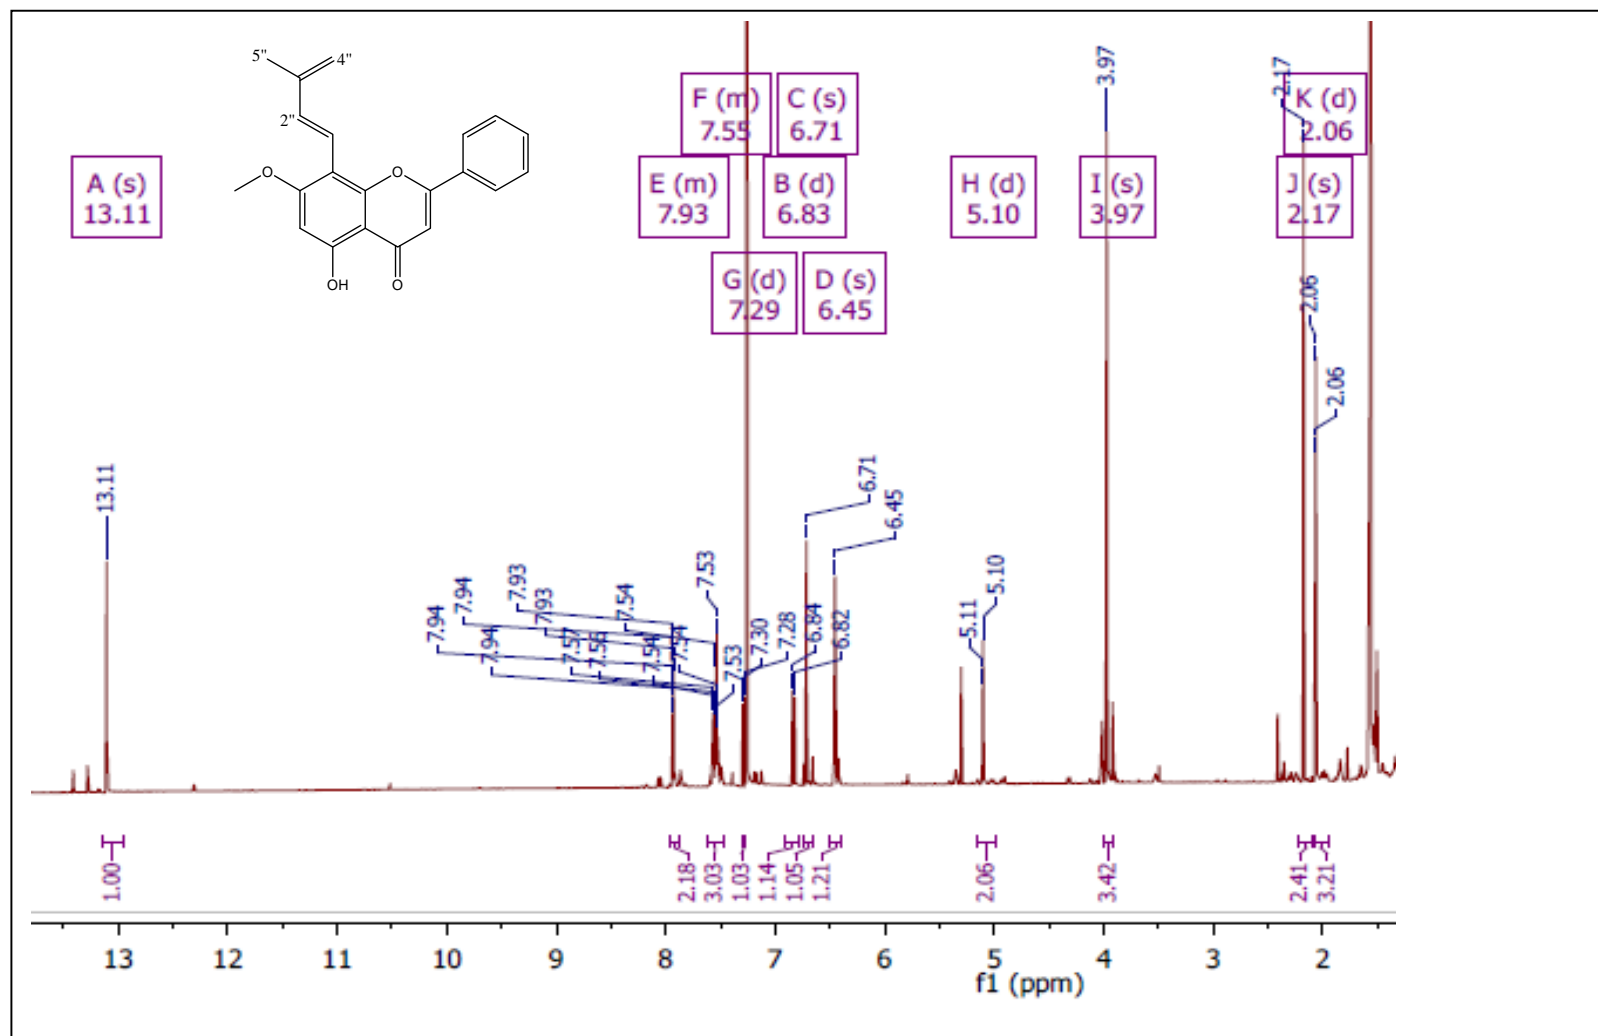

Fig. S16:  $^1\text{H}$  NMR spectrum of compound 3 (800 MHz;  $\text{CDCl}_3$ )

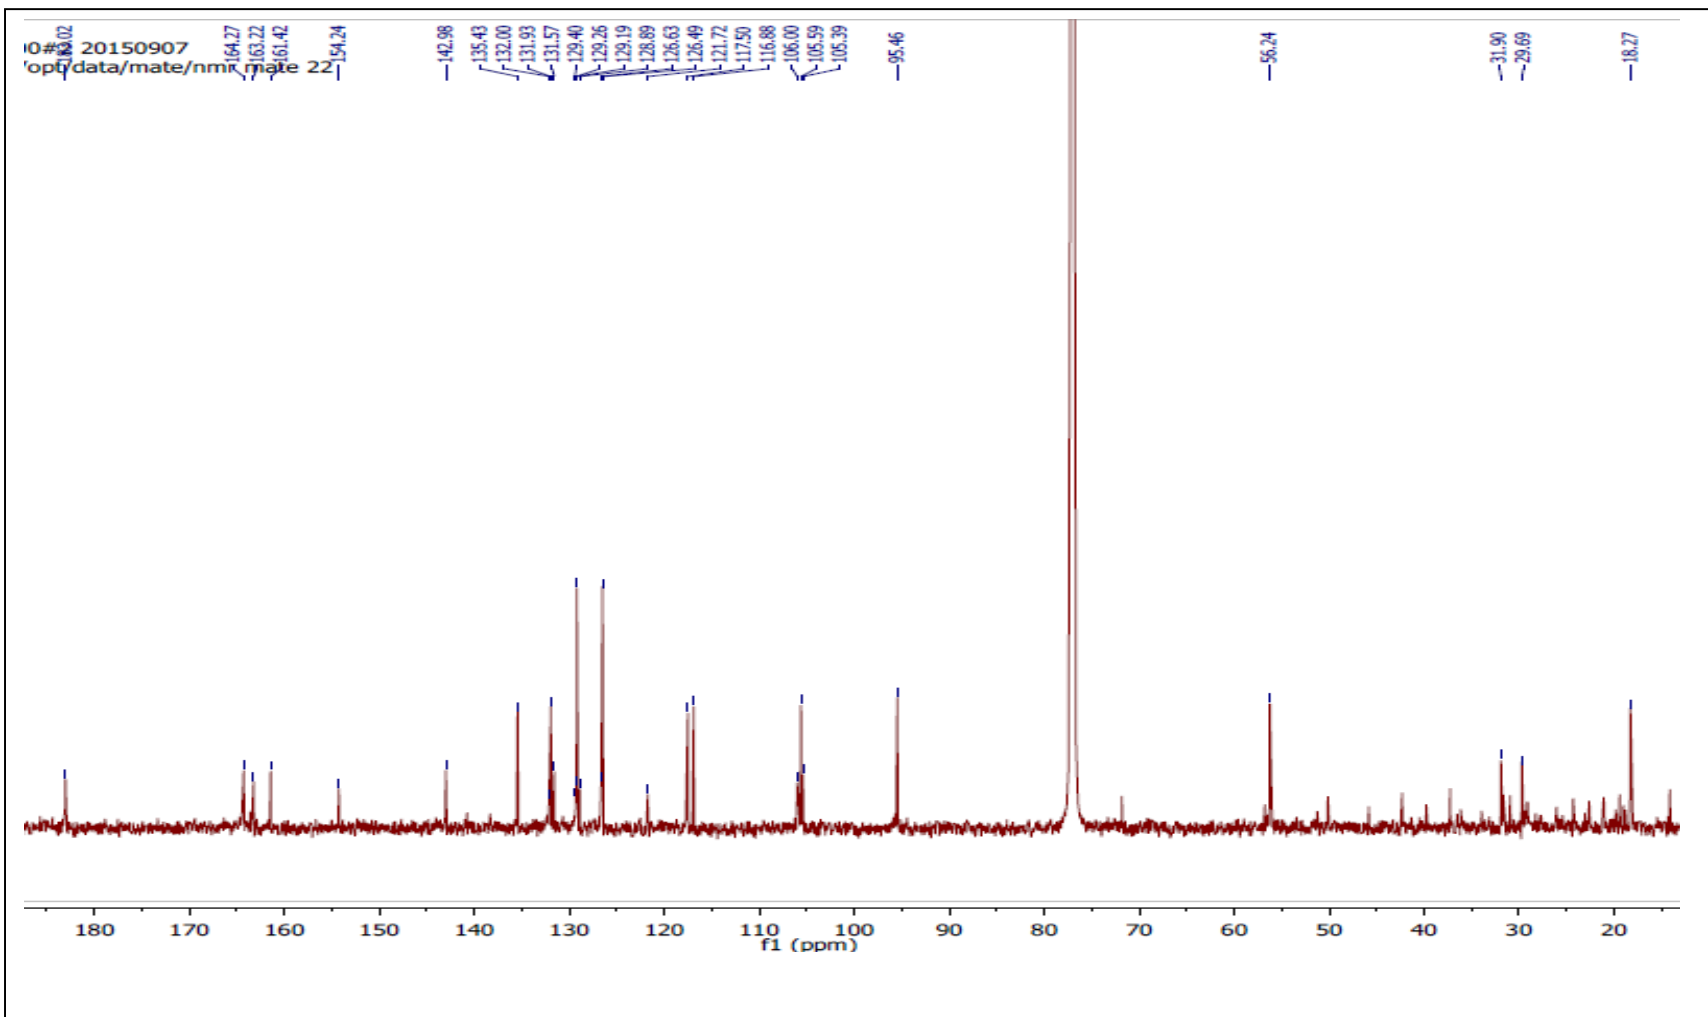

Fig. S17:  $^{13}\text{C}$  NMR spectrum of compound **3** (200 MHz;  $\text{CDCl}_3$ )

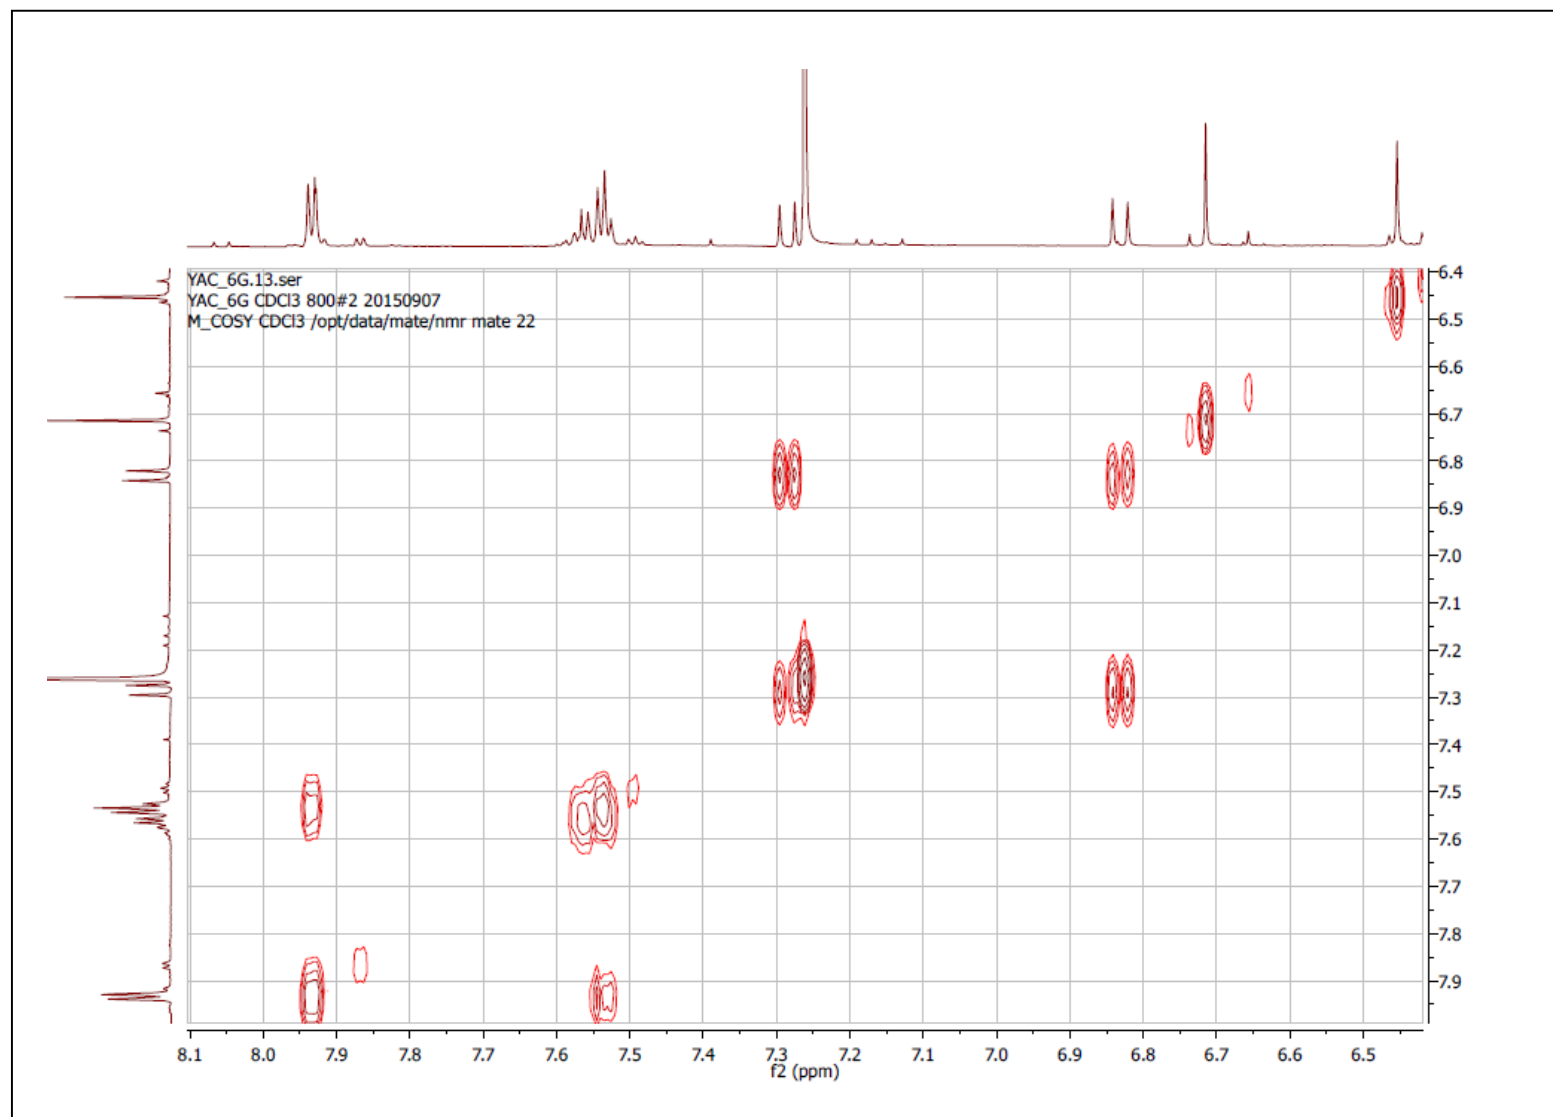

Fig. S18: COSY NMR spectrum of compound **3** (CDCl<sub>3</sub>)

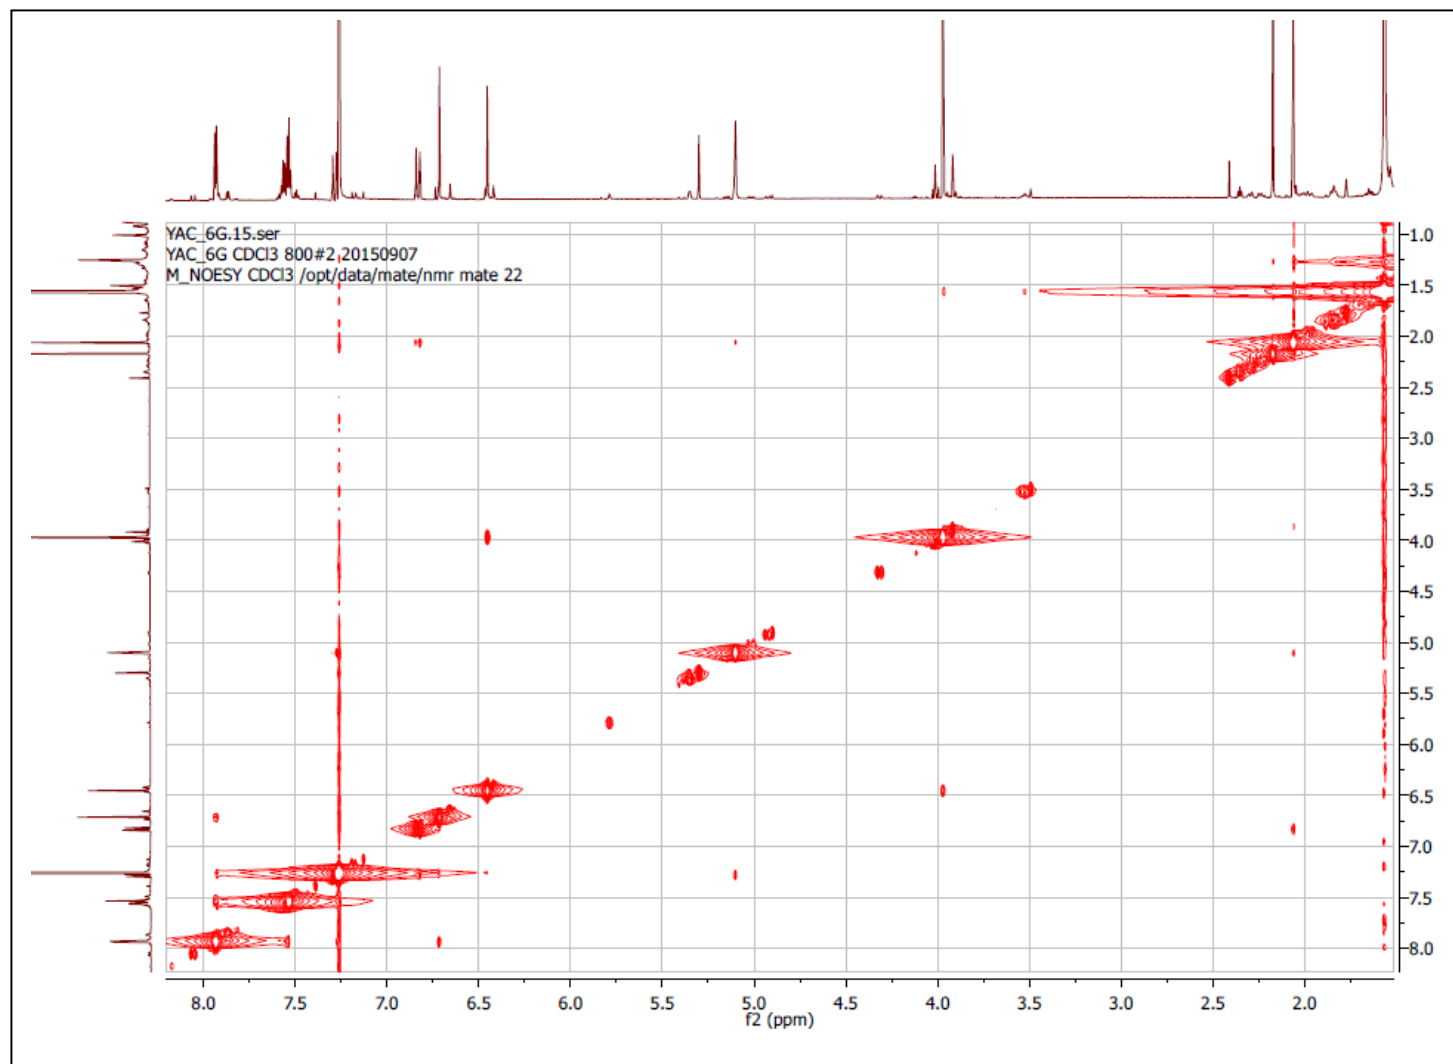

Fig. S19: NOESY spectrum of compound **3** (CDCl<sub>3</sub>)

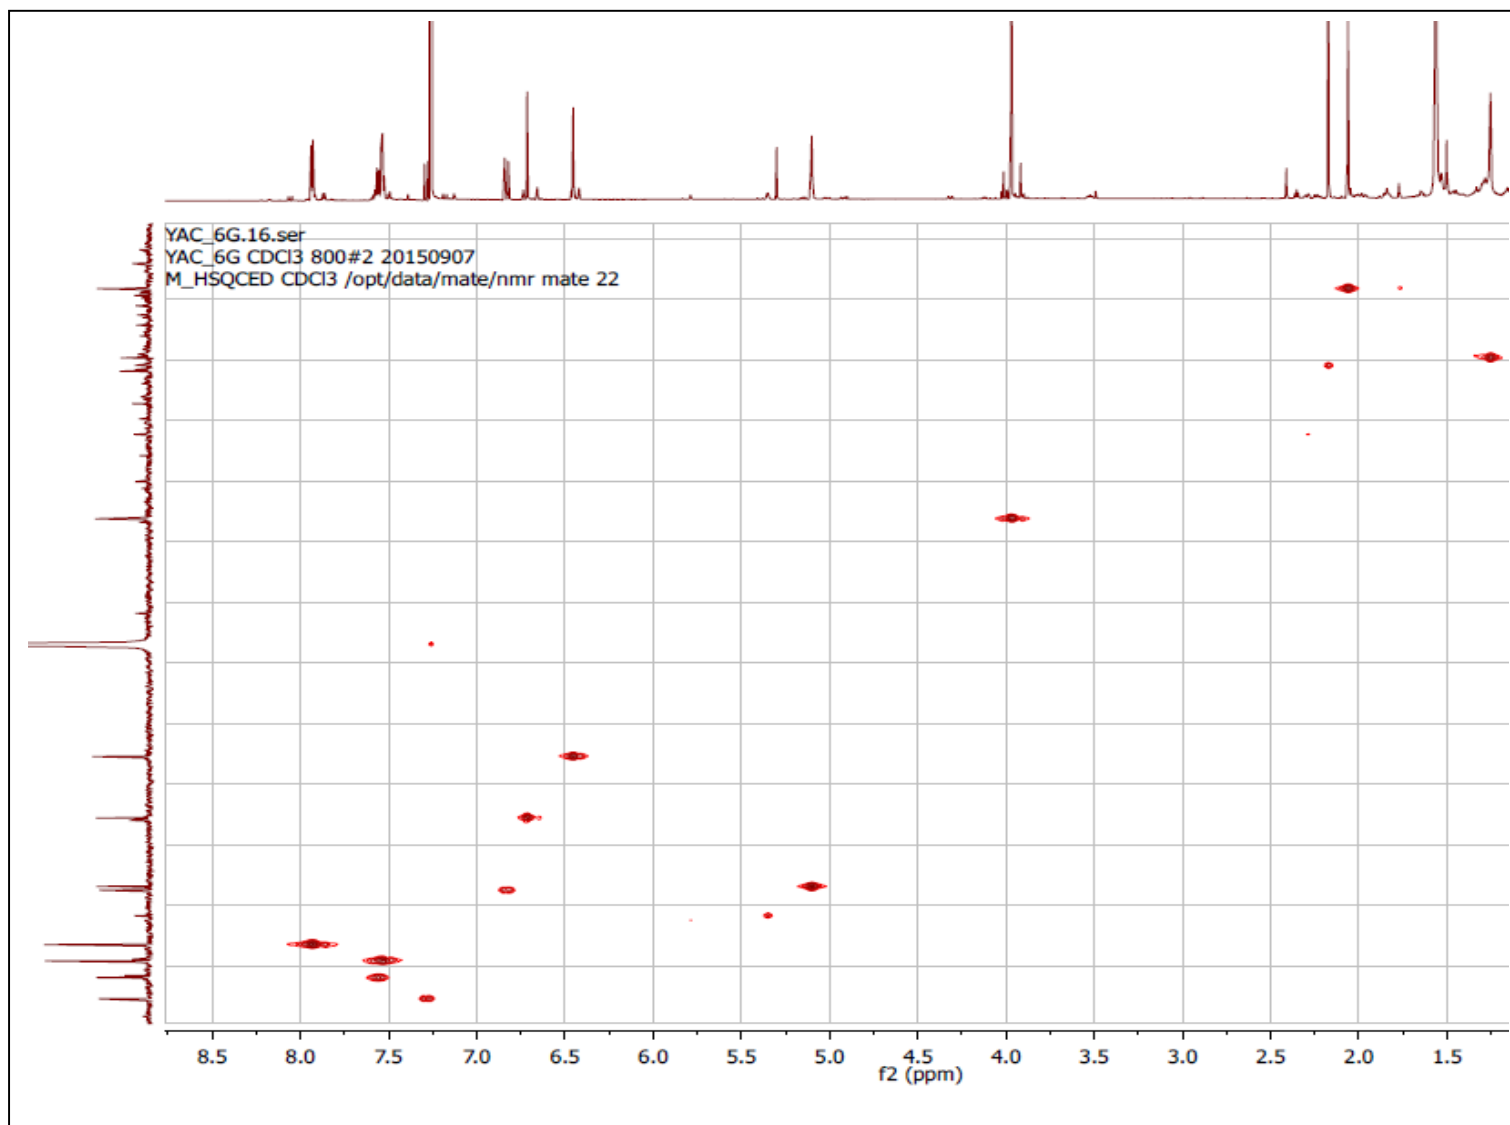

Fig. S20: HSQC NMR spectrum of compound **3** (CDCl<sub>3</sub>)

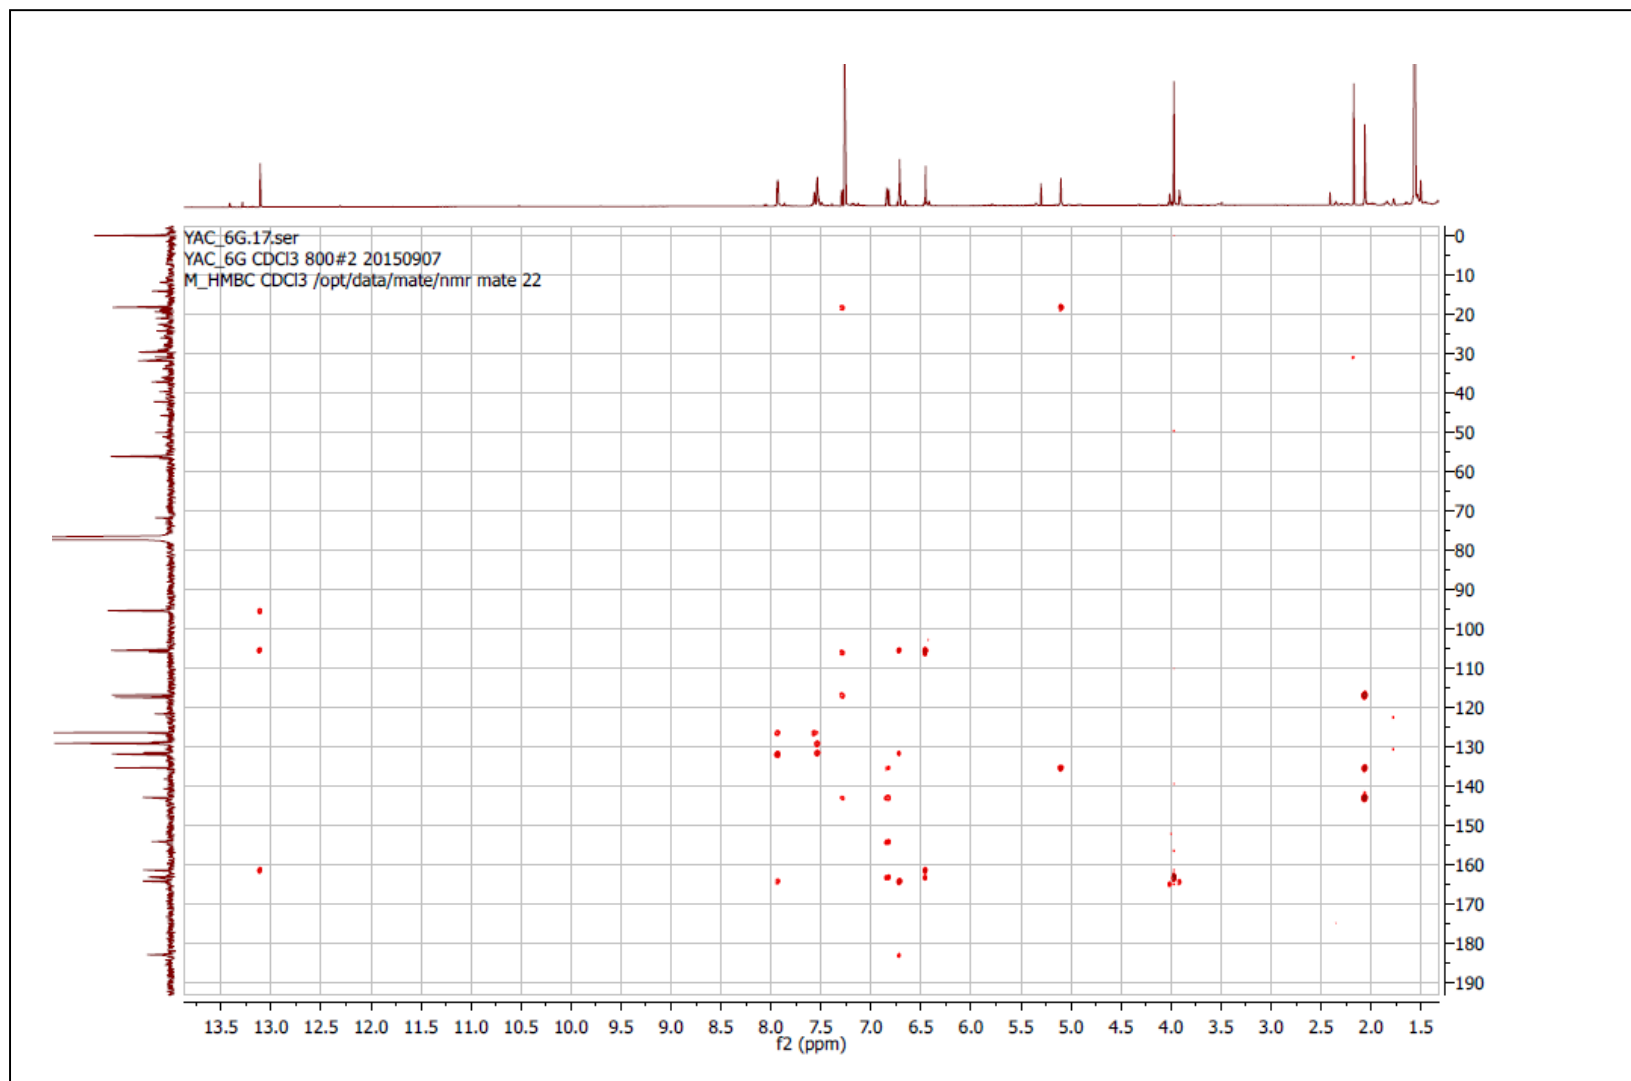

Fig. S21: HBMC spectrum of compound **3** (CDCl<sub>3</sub>)

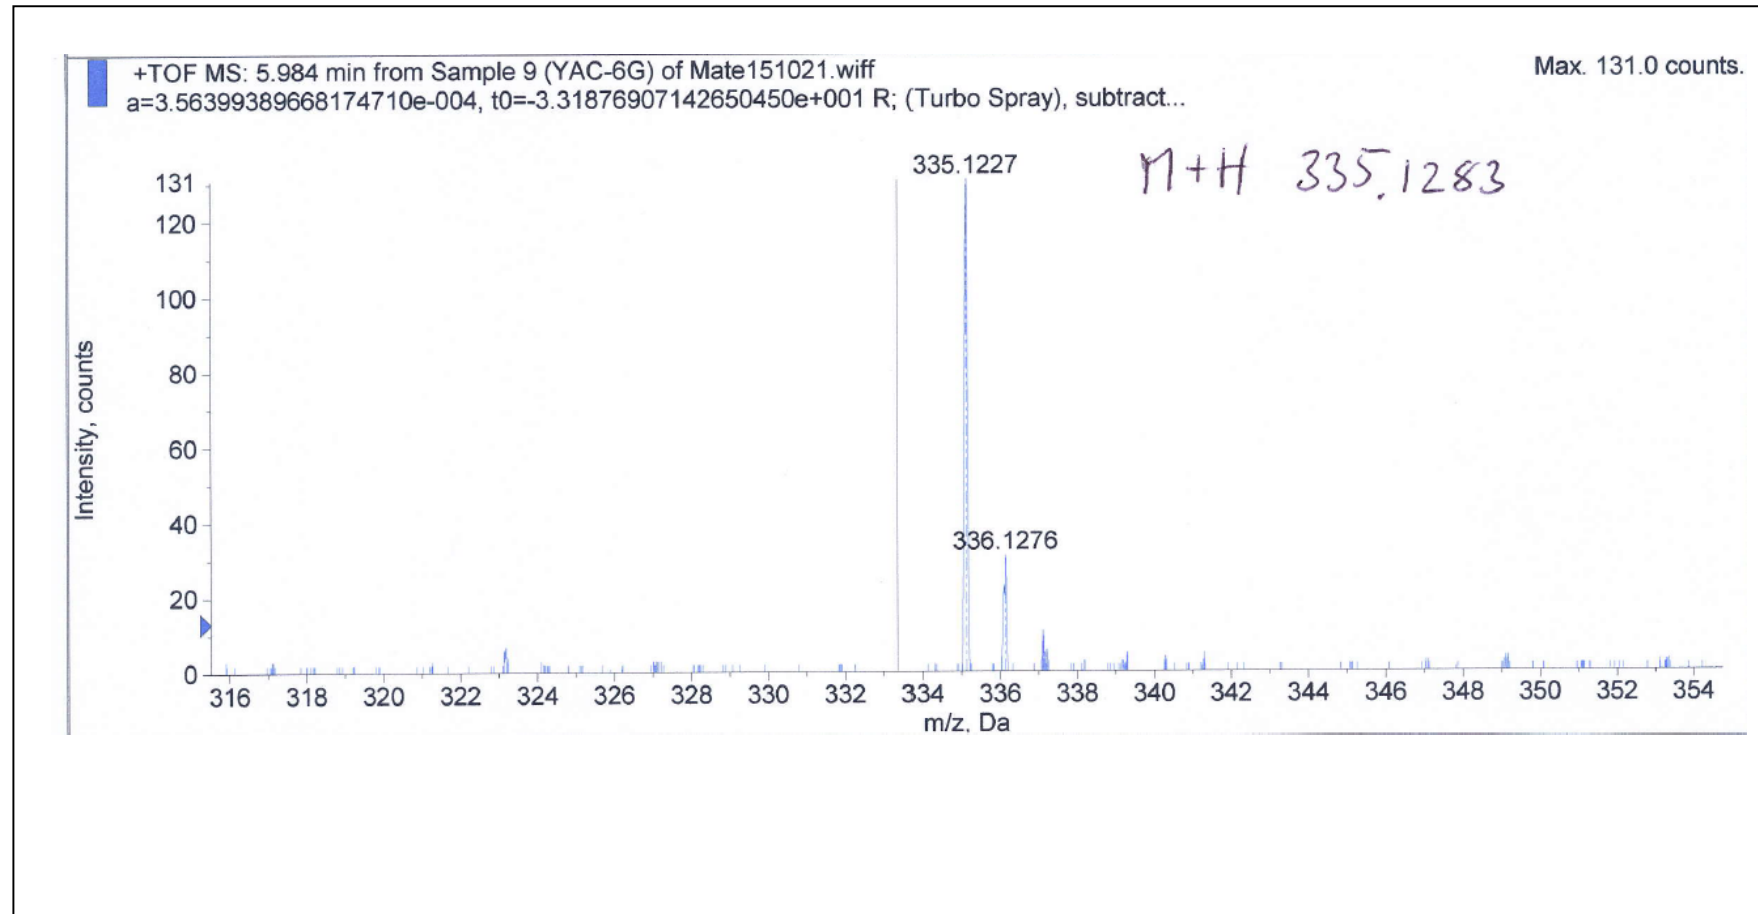

Fig. S22: HRMS of compound **3**

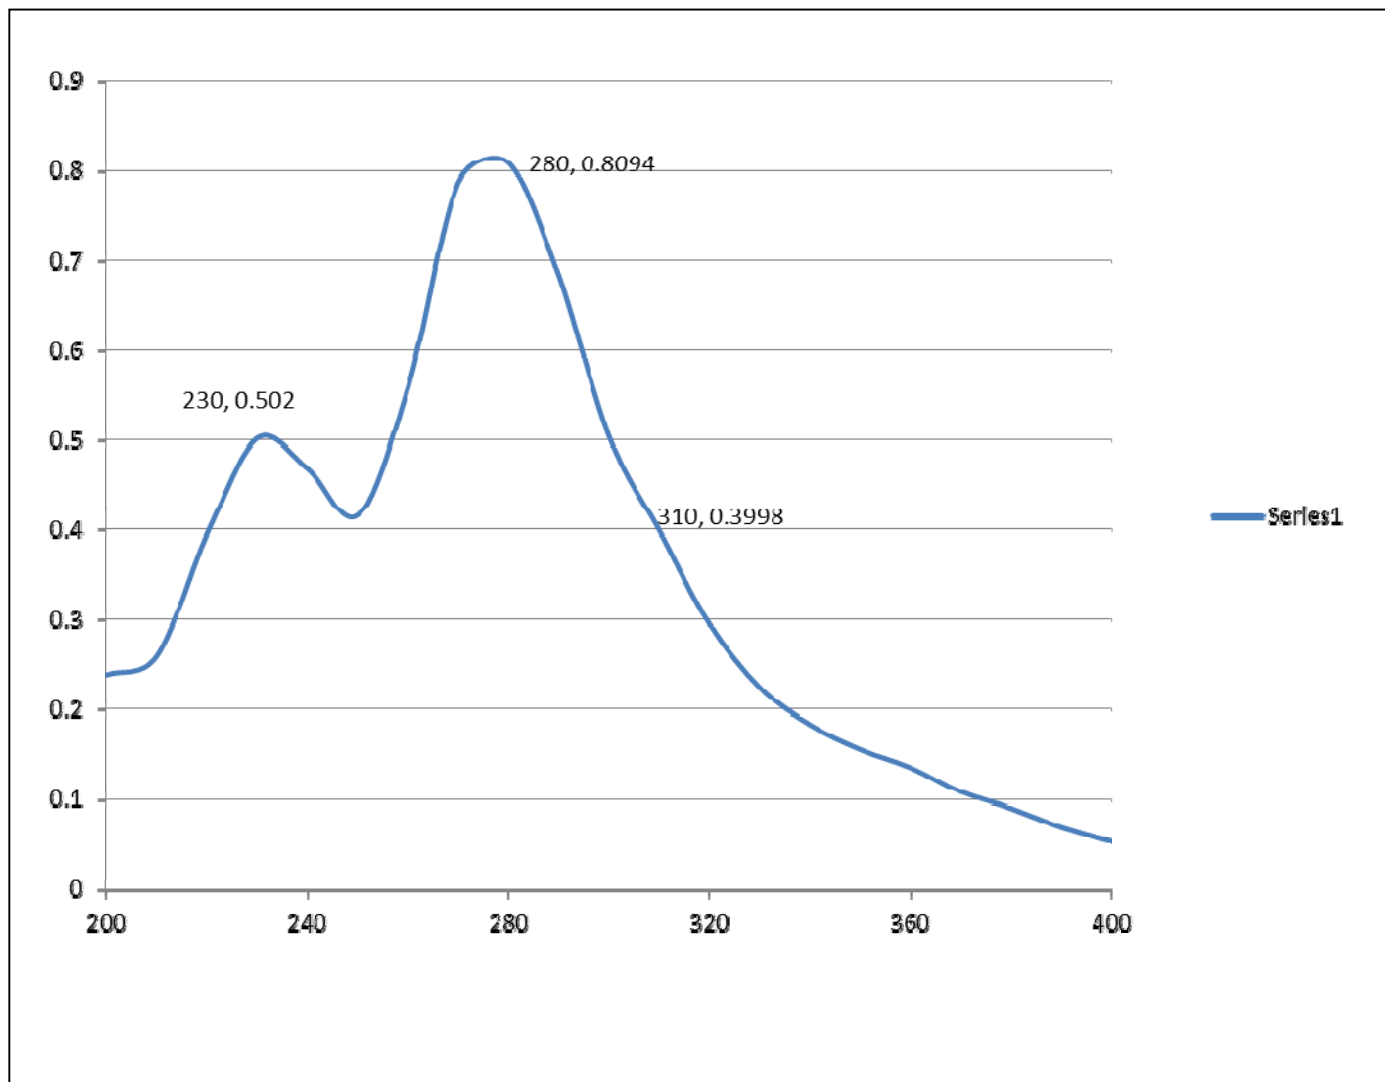

Fig. S23: UV spectrum of compound 3



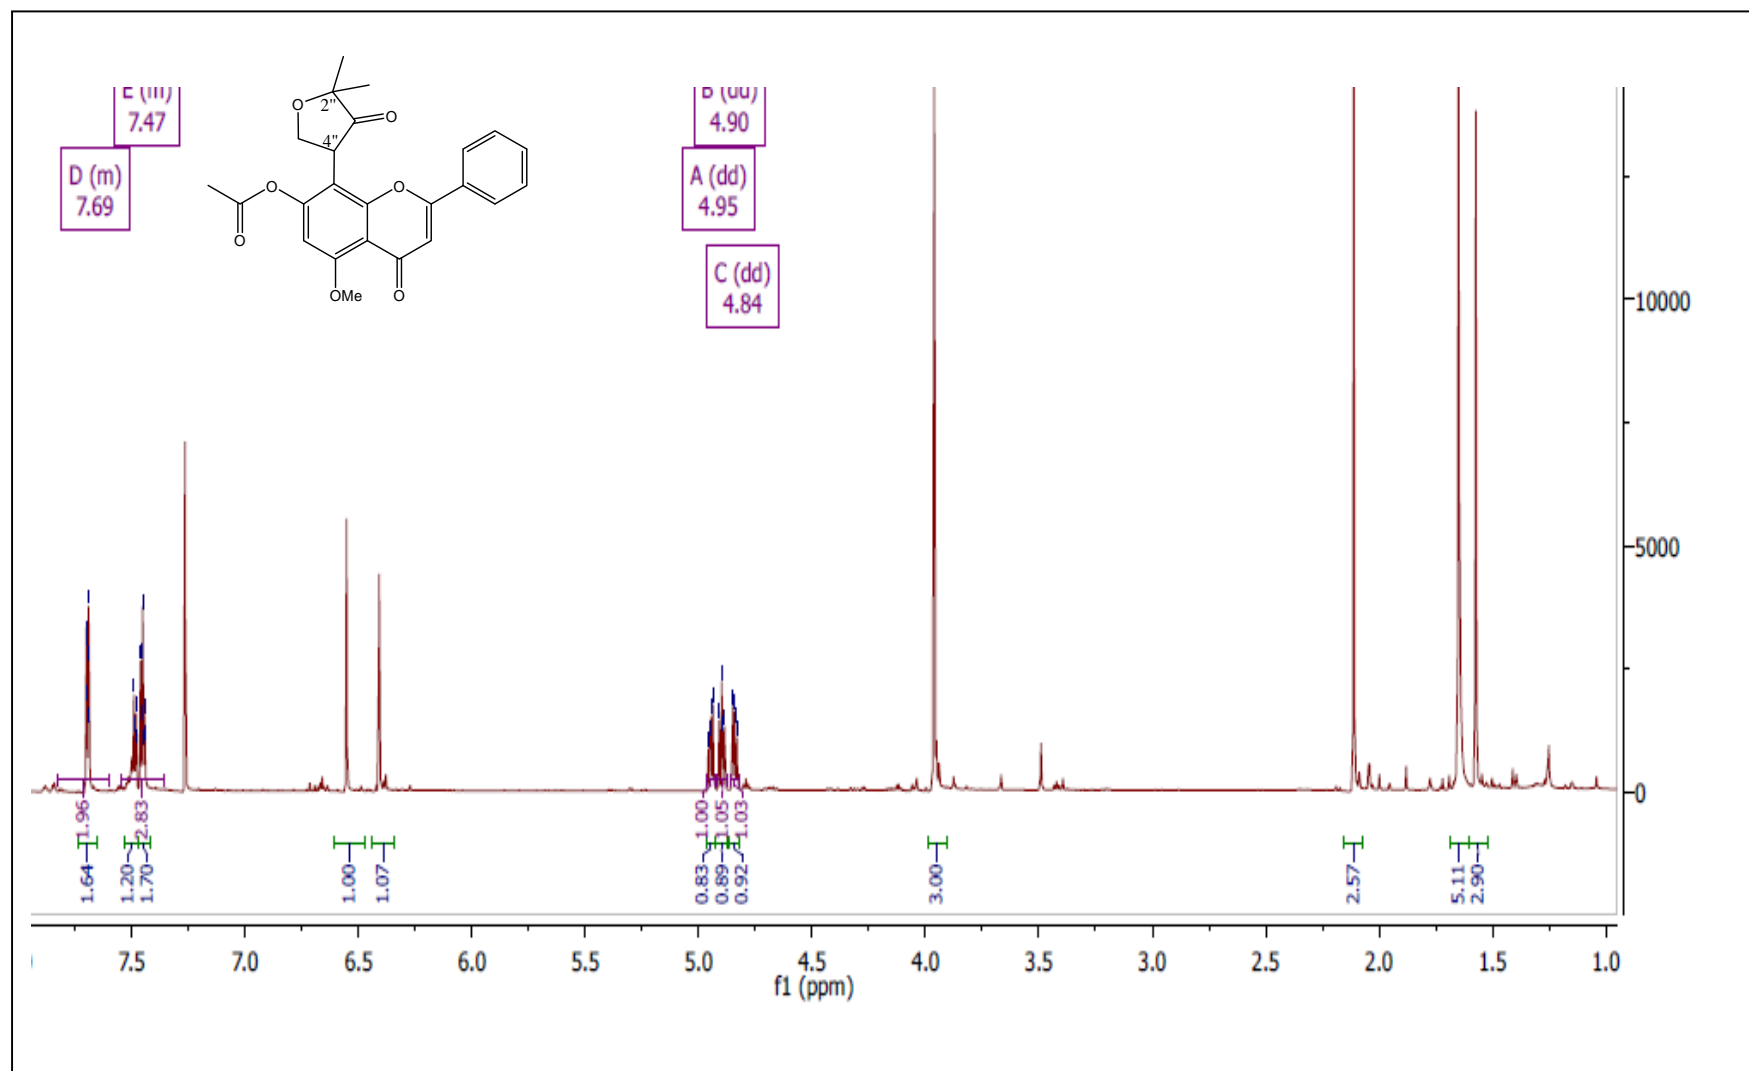

Fig. S24: <sup>1</sup>H NMR spectrum of compound 4 (800 MHz; CDCl<sub>3</sub>)

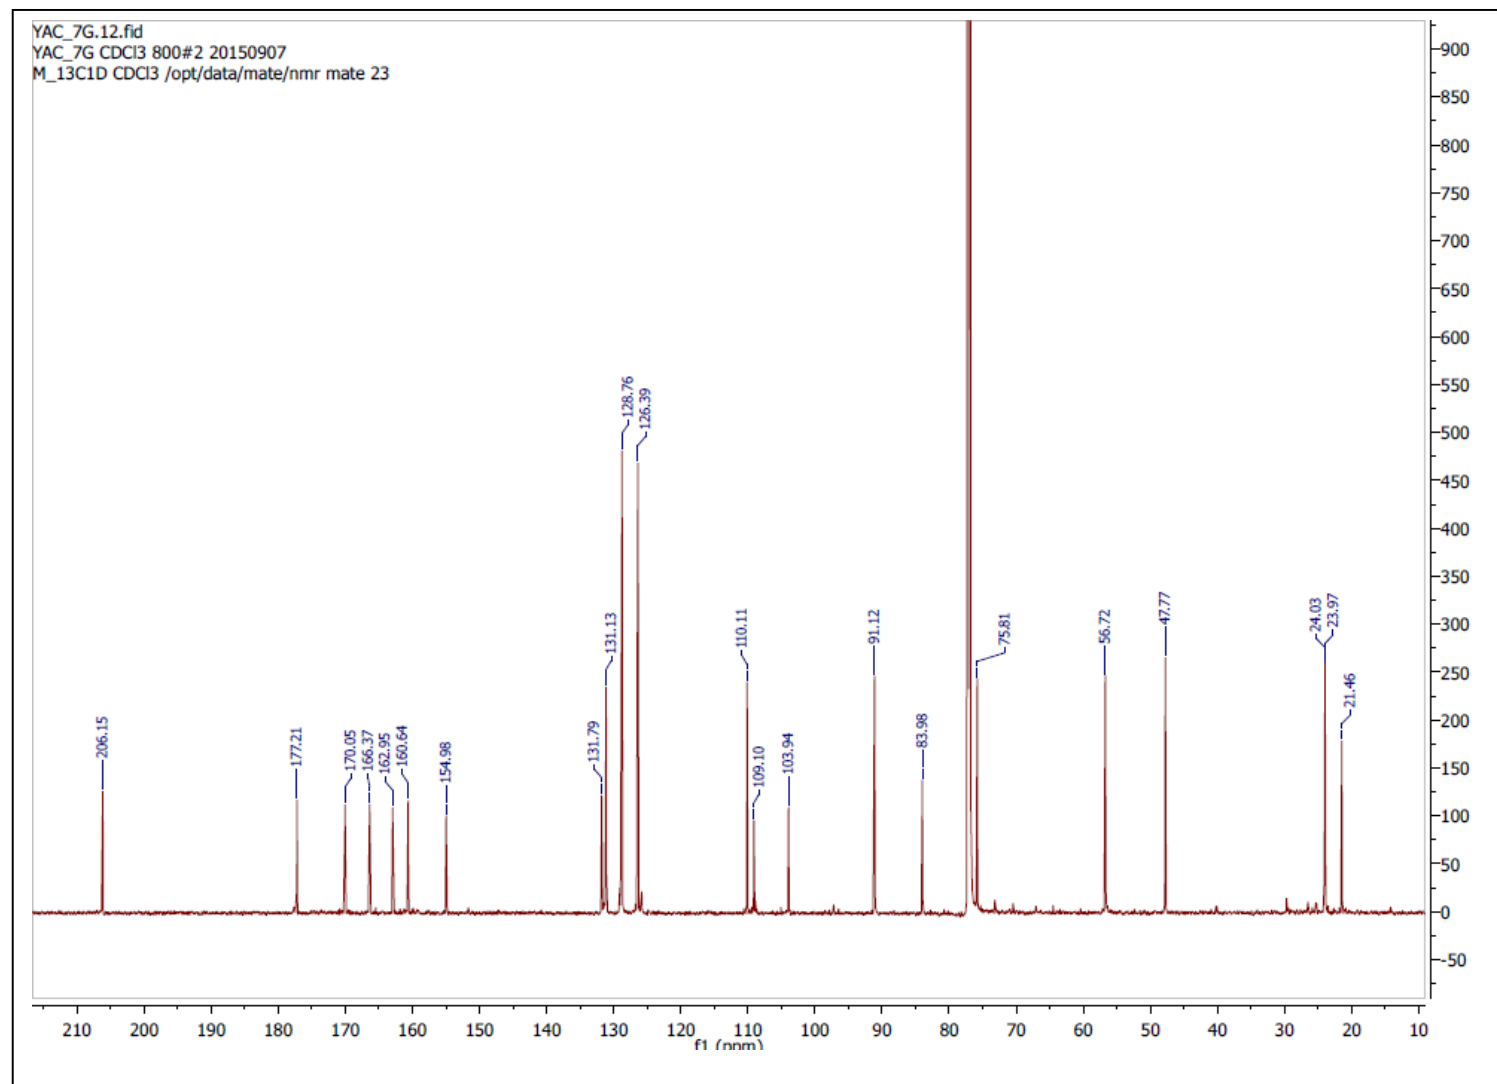

Fig. S25:  $^{13}\text{C}$  NMR spectrum of compound **4** (200 MHz;  $\text{CDCl}_3$ )

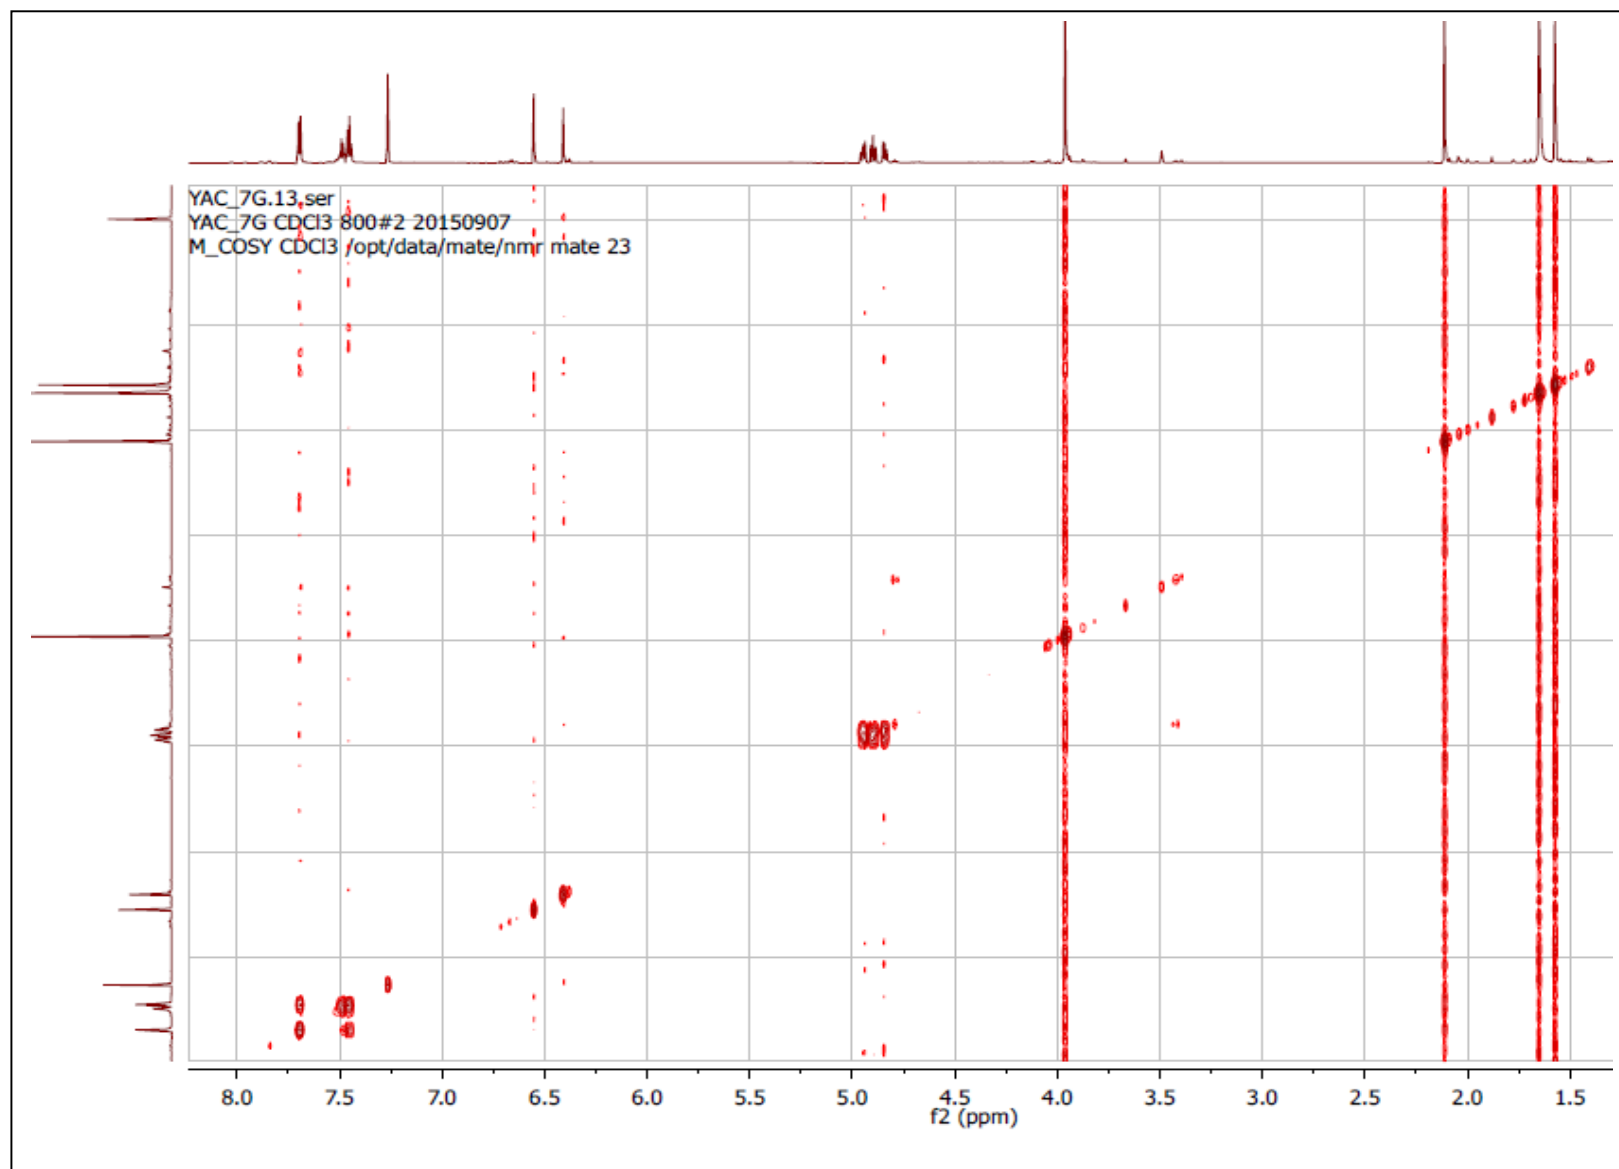

Fig. S26: COSY NMR spectrum of compound 4 (CDCl<sub>3</sub>)

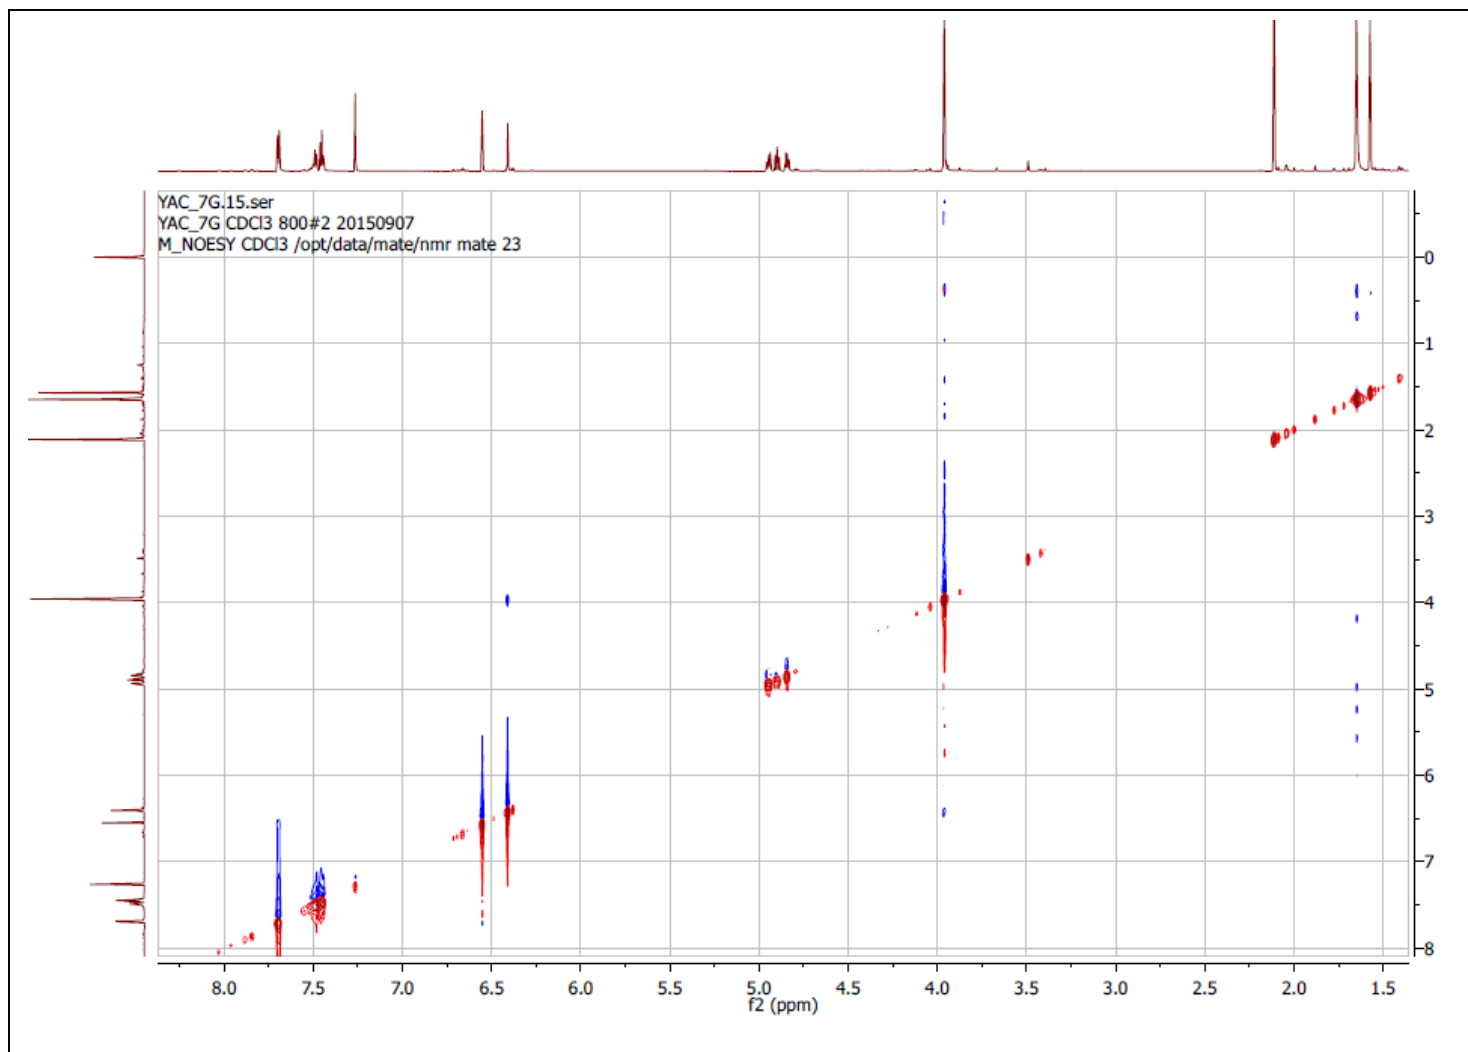

Fig. S27: NOESY spectrum of compound **4** (CDCl<sub>3</sub>)

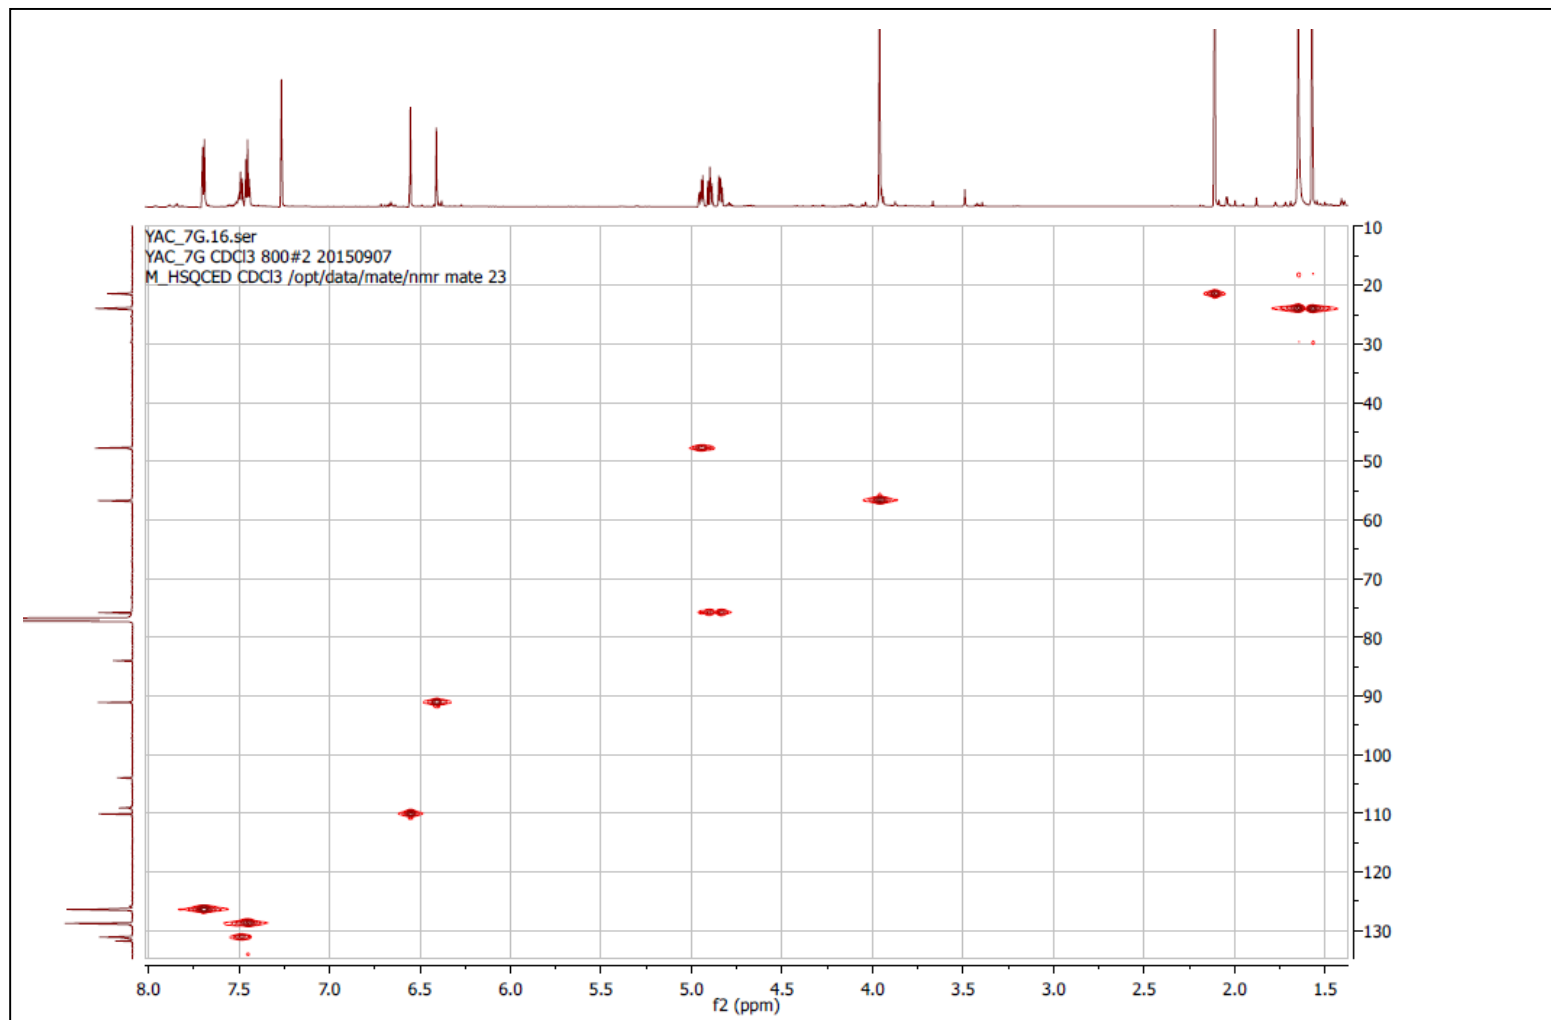

Fig. S28: HSQC NMR spectrum of compound **4** (CDCl<sub>3</sub>)

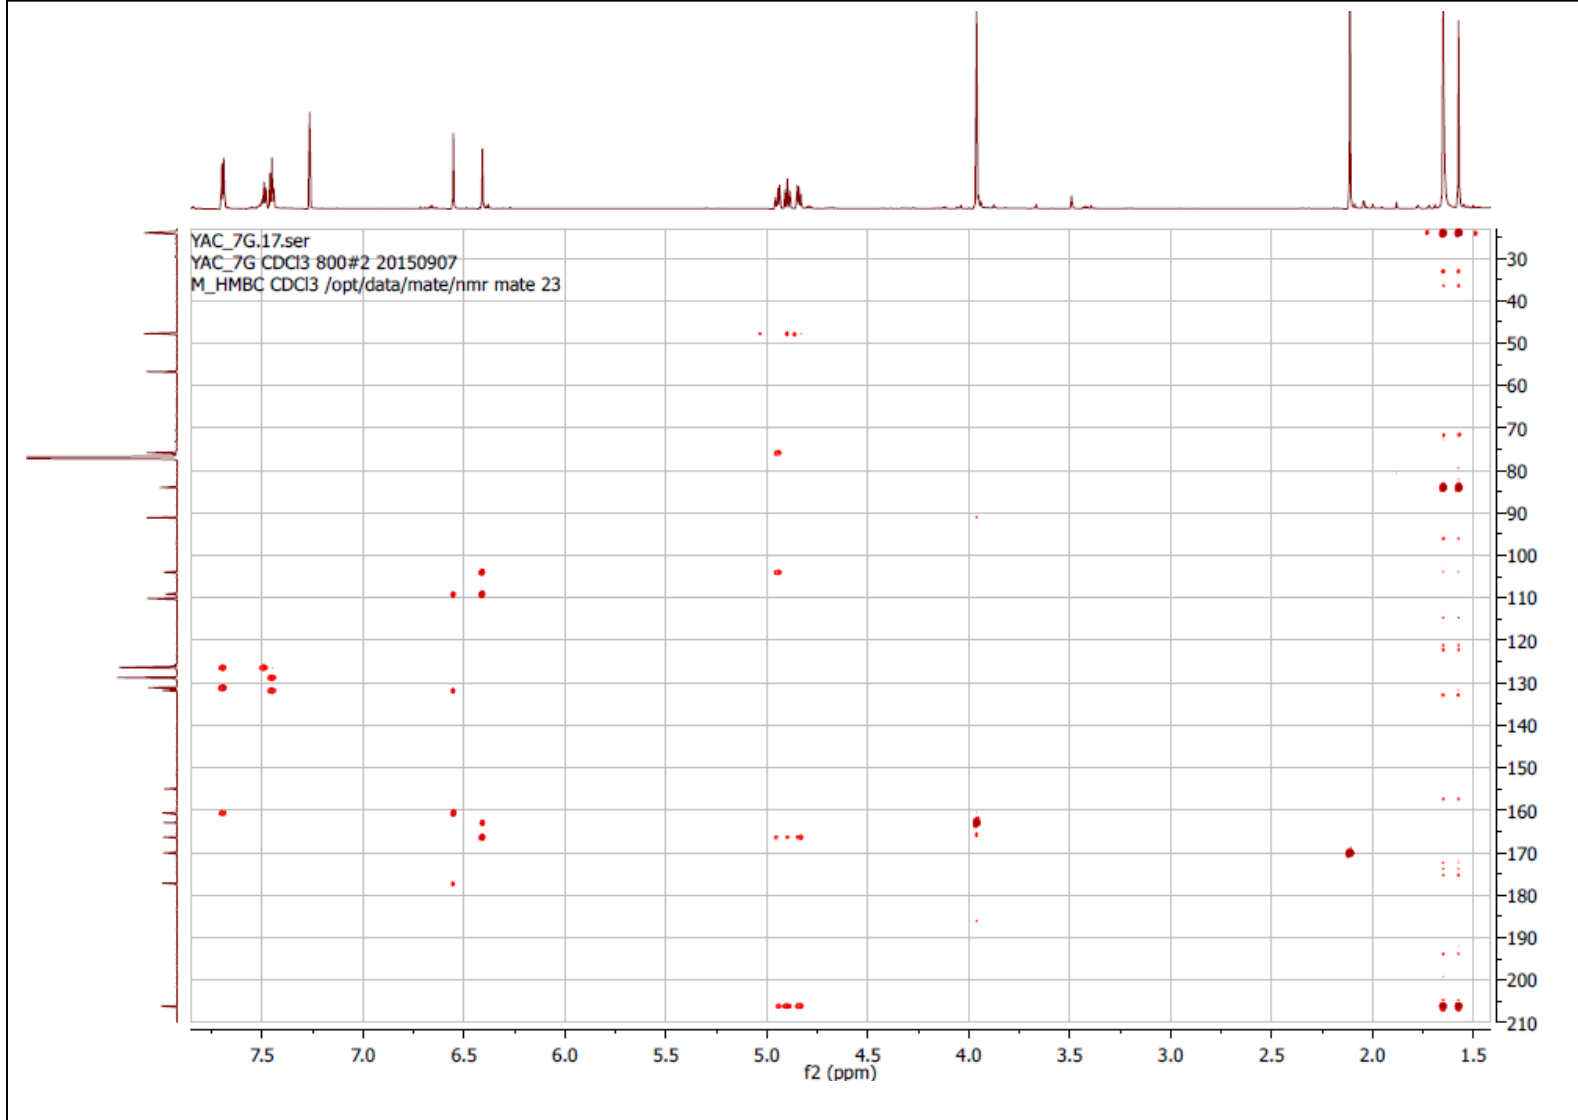

Fig. S29: HMBC NMR spectrum of compound 4 (CDCl<sub>3</sub>)

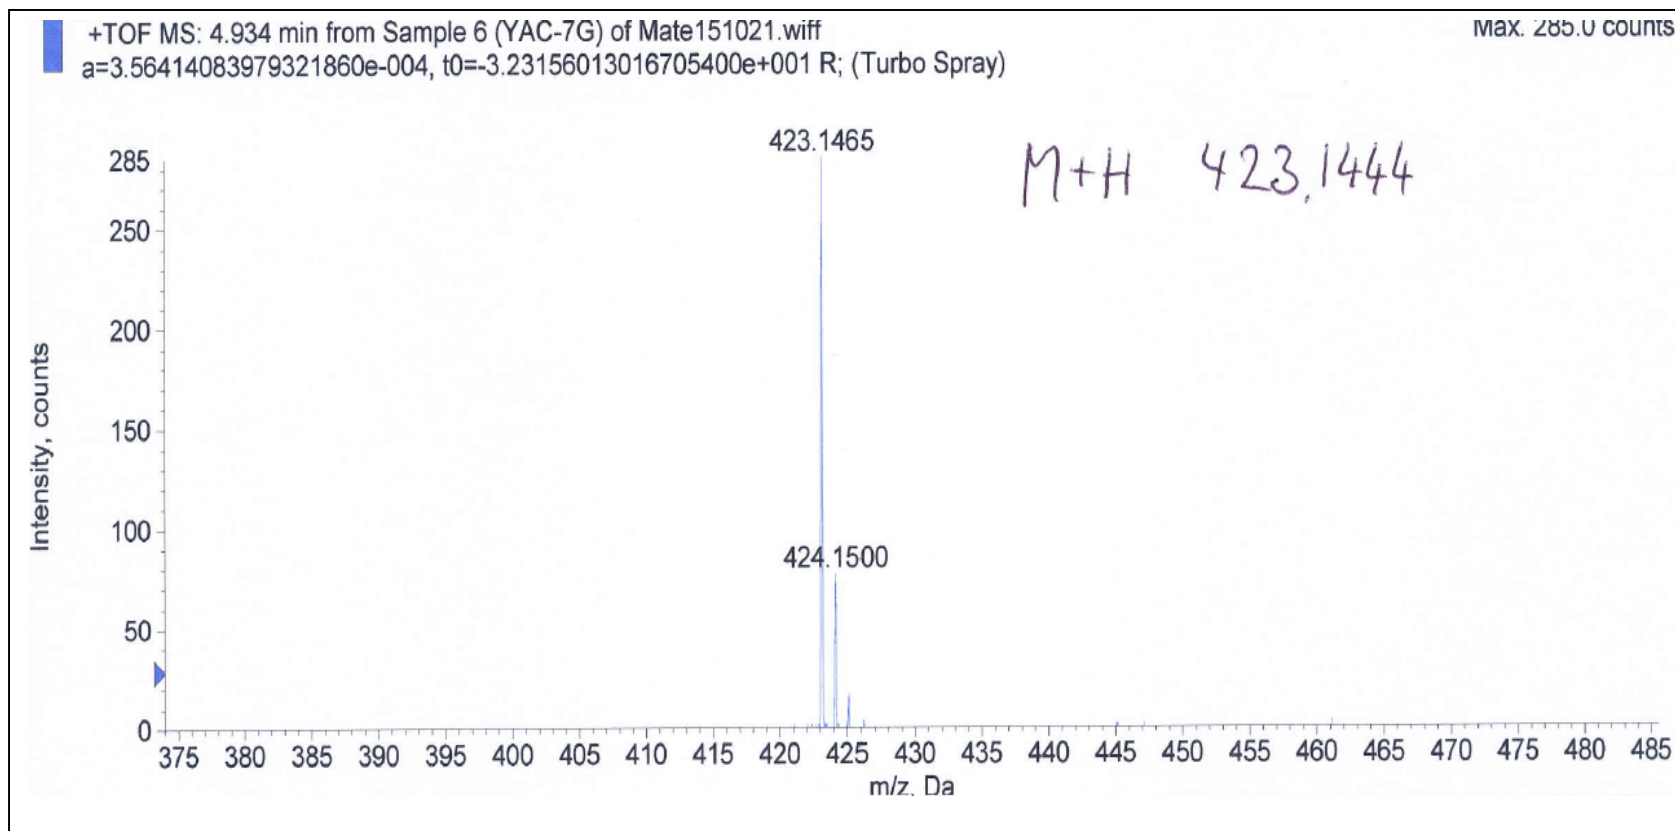

Fig. S30: HRMS of compound 4

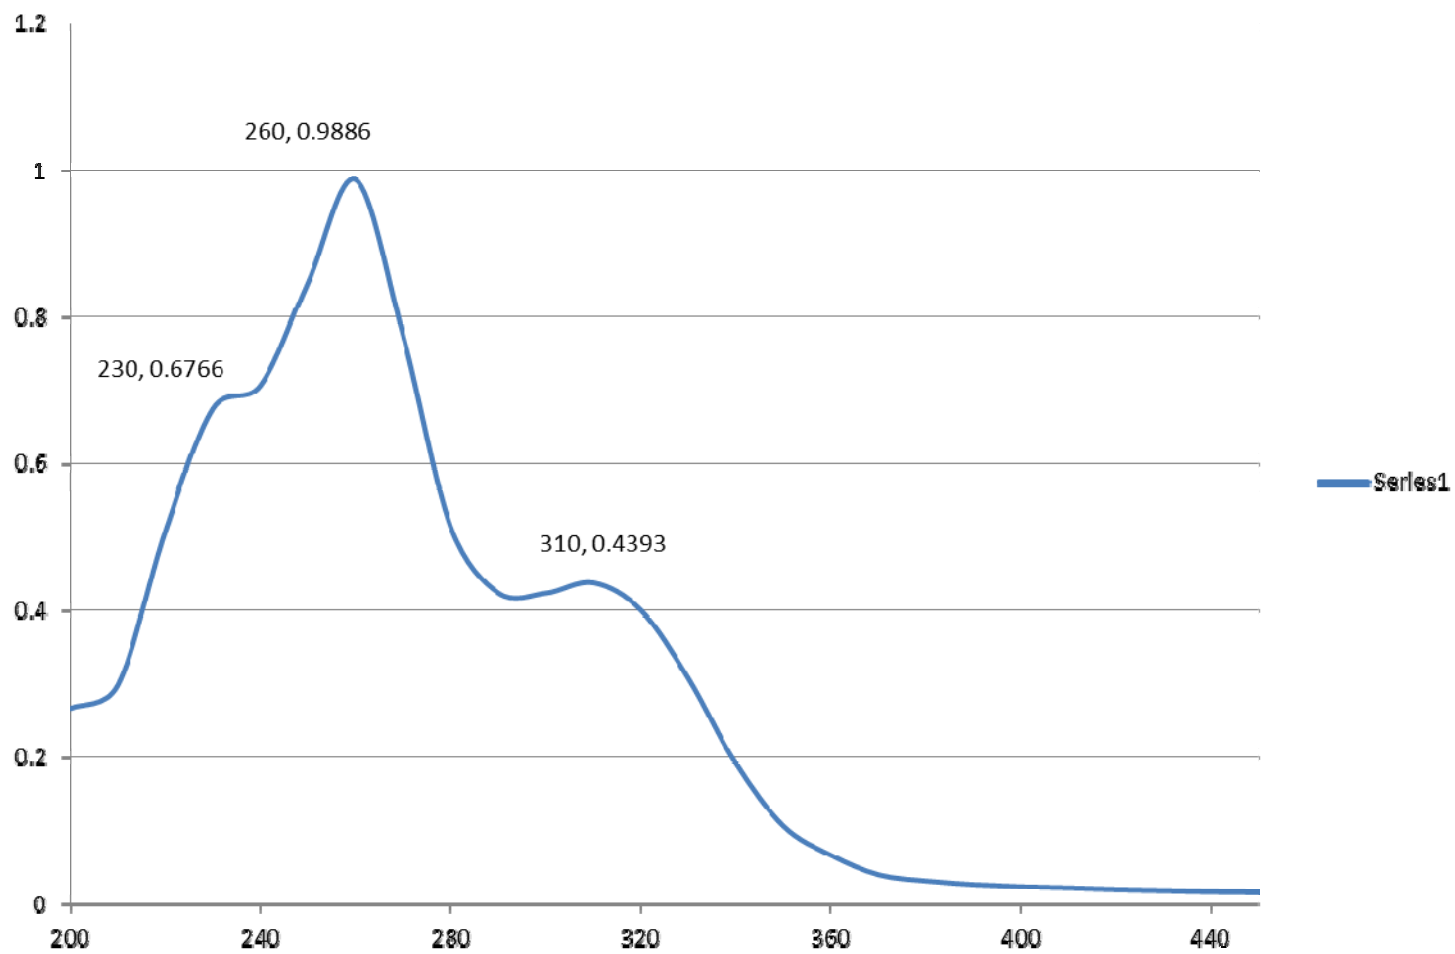

Fig. S31: UV spectrum of compound 4



Table S1.  $^1\text{H}$  (800 MHz) and  $^{13}\text{C}$  (200 MHz) NMR spectroscopic data for compound **5**,  $\text{CDCl}_3$

| Position | $\delta_{\text{C}}$ (ppm) | $\delta_{\text{H}}$ (ppm), <i>m</i> | HMBC correlations      |
|----------|---------------------------|-------------------------------------|------------------------|
| 2        | 153.91                    | 8.00 <i>s</i>                       | C-3, C-4, C-8a, C-1'   |
| 3        | 122.94                    |                                     |                        |
| 4        | 180.77                    |                                     |                        |
| 4a       | 104.97                    |                                     |                        |
| 5        | 163.73                    |                                     |                        |
| 5-OH     |                           | 12.95 <i>s</i>                      |                        |
| 6        | 99.21                     | 6.26 <i>d</i> (2.11)                | C-4a, C-5, C-7, C-8    |
| 7        | 165.12                    |                                     |                        |
| 8        | 93.88                     | 6.39 <i>d</i> (2.11)                | C-4a, C-6, C-7, C-8a   |
| 8a       | 158.26                    |                                     |                        |
| 1'       | 122.60                    |                                     |                        |
| 2',6'    | 130.0                     | 7.41 <i>d</i> (8.65)                | C-3, C-4', C-2', C-6'  |
| 3',5'    | 115.07                    | 6.90 <i>d</i> (8.65)                | C-1', C-3', C-4', C-5' |
| 4'       | 157.05                    |                                     |                        |

Table S2.  $^1\text{H}$  (800 MHz) and  $^{13}\text{C}$  (200 MHz) NMR spectroscopic data for compound **6**,  $\text{CDCl}_3$

| Position                  | $\delta$ (ppm)      |                                                               | HMBC correlations                 |
|---------------------------|---------------------|---------------------------------------------------------------|-----------------------------------|
|                           | $\delta_{\text{C}}$ | $\delta_{\text{H}}$ , <i>m</i> , ( <i>J</i> in Hz)            |                                   |
| <b>2</b>                  | 78.98               | 5.42 <i>dd</i> (3.04, 13.03)                                  | C-4, C-1', C-2'/6', C-8a          |
| <b>3</b>                  | 43.47               | 3.05 <i>dd</i> (13.00, 17.10)<br>2.85 <i>dd</i> (3.09, 17.12) | C-2, C-4, C-1'<br>C-4, C-4a, C-1' |
| <b>4(C=O)</b>             | 196.20              |                                                               |                                   |
| <b>4a</b>                 | 103.19              |                                                               |                                   |
| <b>5</b>                  | 162.23              |                                                               |                                   |
| <b>5(OH)</b>              |                     | 11.99 <i>s</i>                                                | C-5, C-6, C-4a                    |
| <b>6</b>                  | 96.92               | 6.03 <i>s</i>                                                 | C-4a, C-5, C-7, C-8               |
| <b>7</b>                  | 163.72              |                                                               |                                   |
| <b>8</b>                  | 109.02              |                                                               |                                   |
| <b>8a</b>                 | 159.61              |                                                               |                                   |
| <b>1'</b>                 | 138.68              | -                                                             |                                   |
| <b>2'/6'</b>              | 125.93              | 7.46                                                          | C-2, C-2'/6', C-3'/5'             |
| <b>3'/5'</b>              | 128.79              | 7.45                                                          | C-1', C-3'/5'                     |
| <b>4'</b>                 | 128.57              | 7.39                                                          | C-2'/6'                           |
| <b>1''</b>                | 21.80               | 3.33 <i>bt</i>                                                | C-7, C-8, C-8a, C-3'', C-2''      |
| <b>2''</b>                | 121.56              | 5.22 <i>btt</i>                                               | C-1'', 3''-Me <sub>2</sub>        |
| <b>3''</b>                | 134.97              |                                                               |                                   |
| <b>3''-Me<sub>2</sub></b> | 17.84<br>25.82      | 1.73<br>1.73                                                  | C-3'', C-2''                      |

Table S3. <sup>1</sup>H (800 MHz) and <sup>13</sup>C (200 MHz) NMR spectroscopic data for compound **7**, CDCl<sub>3</sub>

| Position            |                      |                                                               | HMBC correlations                 |
|---------------------|----------------------|---------------------------------------------------------------|-----------------------------------|
|                     | δ <sub>C</sub> (ppm) | δ <sub>H</sub> (ppm), <i>m</i> , ( <i>J</i> in Hz)            |                                   |
| <b>1</b>            |                      |                                                               |                                   |
| <b>2</b>            | 78.95                | 5.42 <i>dd</i> (13.17, 2.39)                                  |                                   |
| <b>3</b>            | 45.64                | 2.83 <i>dd</i> (16.46, 2.98)<br>2.99 <i>dd</i> (16.49, 13.16) | C-2, C-4, C-1'<br>C-4, C-4a, C-1' |
| <b>4(C=O)</b>       | 176.94               |                                                               |                                   |
| <b>4a</b>           | 105.66               |                                                               |                                   |
| <b>5</b>            | 162.13               |                                                               |                                   |
| <b>6</b>            | 93.79                | 6.06 <i>s</i>                                                 | C-4, C-4a, C-5, C-7, C-8          |
| <b>7</b>            | 160.01               |                                                               |                                   |
| <b>8</b>            | 102.89               |                                                               |                                   |
| <b>8a</b>           | 158.79               |                                                               |                                   |
| <b>1'</b>           | 138.95               | -                                                             |                                   |
| <b>2'/6'</b>        | 125.93               | 7.46                                                          | C-2, C-2'/6', C-3'/5', C-4'       |
| <b>3'/5'</b>        | 128.73               | 7.42                                                          | C-3'/5', C-1'                     |
| <b>4'</b>           | 128.90               | 7.38                                                          | C-2'/6'                           |
| <b>2''</b>          | 78.03                |                                                               |                                   |
| <b>3''</b>          | 126.32               | 5.47 <i>d</i> (10.0)                                          | C-8, C-2'', 2''-Me <sub>2</sub>   |
| <b>4''</b>          | 115.99               | 6.60 <i>d</i> (10.0)                                          | C-7, C-8, C-8a, C-2''             |
| 2''-Me <sub>2</sub> | 28.20<br>28.50       | 1.45 <i>s</i><br>1.46 <i>s</i>                                | C-3'', C-2'', 2''-Me <sub>2</sub> |
| <b>OMe (C-5)</b>    | 56.20                | 3.90 <i>s</i>                                                 | C-5                               |

Table S4.  $^1\text{H}$  (800 MHz) and  $^{13}\text{C}$  (200 MHz) NMR spectroscopic data for compound **8**,  $\text{CDCl}_3$

| Position | $\delta_{\text{C}}$ (ppm) | $\delta_{\text{H}}$ (ppm), <i>m</i> | HMBC correlations      |
|----------|---------------------------|-------------------------------------|------------------------|
| 2        | 153.91                    | 8.00 <i>s</i>                       | C-3, C-4, C-8a, C-1'   |
| 3        | 122.94                    |                                     |                        |
| 4        | 180.77                    |                                     |                        |
| 4a       | 104.97                    |                                     |                        |
| 5        | 163.73                    |                                     |                        |
| 5-OH     |                           | 12.95 <i>s</i>                      |                        |
| 6        | 99.21                     | 6.26 <i>d</i> (2.11)                | C-4a, C-5, C-7, C-8    |
| 7        | 165.12                    |                                     |                        |
| 8        | 93.88                     | 6.39 <i>d</i> (2.11)                | C-4a, C-6, C-7, C-8a   |
| 8a       | 158.26                    |                                     |                        |
| 1'       | 122.60                    |                                     |                        |
| 2',6'    | 130.0                     | 7.41 <i>d</i> (8.65)                | C-3, C-4', C-2', C-6'  |
| 3',5'    | 115.07                    | 6.90 <i>d</i> (8.65)                | C-1', C-3', C-4', C-5' |
| 4'       | 157.05                    |                                     |                        |

Table S5.  $^1\text{H}$  (800 MHz) and  $^{13}\text{C}$  (200 MHz) NMR spectroscopic data for compound **9**,  $\text{CDCl}_3$

| Position   | $\delta_{\text{C}}$ (ppm) | $\delta_{\text{H}}$ (ppm), <i>m</i> | HMBC correlations        |
|------------|---------------------------|-------------------------------------|--------------------------|
| 2          | 161.07                    |                                     |                          |
| 3          | 108.86                    | 6.63 <i>s</i>                       | C-2, C-4, C-4a, C-1'     |
| 4          | 204.51                    |                                     |                          |
| 4a         | 109.10                    |                                     |                          |
| 5          | 161.23                    |                                     |                          |
| 6          | 91.63                     | 6.45 <i>s</i>                       | C-4, C-4a, C-5, C-7, C-8 |
| 7          | 161.45                    |                                     |                          |
| 8          | 98.30                     |                                     |                          |
| 8a         | 156.75                    |                                     |                          |
| 1'         | 131.84                    |                                     |                          |
| 2',6'      | 126.21                    | 7.71 <i>m</i>                       | C-2, C-4', C- 2', C-6'   |
| 3',5'      | 128.74                    | 7.41 <i>m</i>                       | C-1', C-3', C-5'         |
| 4'         | 131.11                    | 7.45 <i>m</i>                       | C-2', C-6'               |
| 2''        | 88.07                     |                                     |                          |
| 3''        | 204.51                    |                                     |                          |
| 4''        | 109.51                    |                                     |                          |
| 5''        | 175.67                    | 6.31, <i>s</i>                      | C-2'', C-3'', C-4''      |
| 2 x Me-2'' | 23.05                     | 1.57, <i>s</i>                      | C-3'', C-2''             |

Table S6.  $^1\text{H}$  (800 MHz) and  $^{13}\text{C}$  (200 MHz) NMR spectroscopic data for compound **10**,  $\text{CDCl}_3$

| Position        |                           |                                                         | HMBC correlations             |
|-----------------|---------------------------|---------------------------------------------------------|-------------------------------|
|                 | $\delta_{\text{C}}$ (ppm) | $\delta_{\text{H}}$ (ppm), <i>m</i> , ( <i>J</i> in Hz) |                               |
| <b>1</b>        |                           | -                                                       |                               |
| <b>2</b>        | 158.39                    |                                                         |                               |
| <b>3</b>        | 135.07                    |                                                         |                               |
| <b>4(C=O)</b>   | 178.36                    |                                                         |                               |
| <b>4a</b>       | 106.16                    |                                                         |                               |
| <b>5</b>        | 161.59                    |                                                         |                               |
| <b>5(OH)</b>    |                           | 12.61 <i>s</i>                                          | <b>C-4a, C-6, C-5</b>         |
| <b>6</b>        | 94.19                     | 6.74 <i>d</i> (2.20)                                    | <b>C-4a, C-6, C-8a, C-7</b>   |
| <b>7</b>        | 162.13                    |                                                         |                               |
| <b>8</b>        | 99.14                     | 6.48 <i>d</i> (2.20)                                    | <b>C-6, C-4a, C-7</b>         |
| <b>8a</b>       | 156.67                    |                                                         |                               |
| <b>1'</b>       | 120.98                    | -                                                       |                               |
| <b>2'/6'</b>    | 130.59                    | 7.81 <i>d</i> (8.69)                                    | <b>C-3'/5', C-2'/6', C-4'</b> |
| <b>3'/5'</b>    | 115.18                    | 6.96 <i>d</i> (8.21)                                    | <b>C-3'/5', C-1', C-4'</b>    |
| <b>4'</b>       | 160.36                    | -                                                       |                               |
| <b>2''</b>      | 98.44                     | 5.58 <i>s</i>                                           | <b>C-7</b>                    |
| <b>3''</b>      | 70.26                     | 3.86 <i>bd</i>                                          |                               |
| <b>4''</b>      | 71.13                     | 3.16 <i>m</i>                                           |                               |
| <b>5''</b>      | 72.04                     | 3.33 <i>t</i>                                           |                               |
| <b>6''</b>      | 70.54                     | 3.44 <i>m</i>                                           |                               |
| <b>2'''</b>     | 102.10                    | 5.42 <i>s</i>                                           | <b>C-3</b>                    |
| <b>3'''</b>     | 70.53                     | 4.00 <i>bd</i>                                          |                               |
| <b>4'''</b>     | 70.78                     | 3.50 <i>bd</i>                                          |                               |
| <b>5'''</b>     | 70.67                     | 3.66 <i>bd</i>                                          |                               |
| <b>6'''</b>     | 71.55                     | 3.15 <i>m</i>                                           |                               |
| <b>Me(6'')</b>  | 18.36                     | 1.15 <i>d</i>                                           |                               |
| <b>Me(6''')</b> | 17.95                     | 0.82 <i>d</i>                                           |                               |

Table S7.  $^1\text{H}$  (800 MHz) and  $^{13}\text{C}$  (200 MHz) NMR spectroscopic data for compound **11**,  $\text{CDCl}_3$

| Position     |                           |                                                         |                   |
|--------------|---------------------------|---------------------------------------------------------|-------------------|
|              | $\delta_{\text{C}}$ (ppm) | $\delta_{\text{H}}$ (ppm), <i>m</i> , ( <i>J</i> in Hz) | HMBC correlations |
| <b>1</b>     | 70.96                     | 2.59 <i>d</i> (2.26)                                    |                   |
| <b>2</b>     | 69.25                     | 2.44 <i>dd</i> (2.25, 9.73)                             | C-5               |
| <b>3</b>     | 69.78                     | 2.39 <i>dd</i> (2.24, 9.70)                             |                   |
| <b>4</b>     | 71.54                     | 2.28 <i>t</i> (9.46, 9.46)                              | C-3, C-5,         |
| <b>5</b>     | 82.14                     | 1.95 <i>t</i> (9.46, 9.46)                              | C-3, C-4, OMe-3,  |
| <b>6</b>     | 70.66                     | 2.59 <i>d</i> (2.26)                                    |                   |
| <b>OMe-5</b> | 58.10                     | 2.31                                                    |                   |
